# Supplementary material for: CvkR, a novel MerR-type transcriptional regulator, is a repressor of class 2 type V-K CRISPR-associated transposase systems
Source: bioRxiv preprint, doi:10.1101/2022.05.13.491168, version 1 (2022-05-13)
Supplement: Supplemental Table S1 [file 491168_file03.xlsx]

## Sheet: Title
	Table S1. Details of 118 detected CAST systems in cyanobacteria.
	Accession numbers and deduced amino acid sequences are given for all identified Cas12k and CvkR homologs (columns A to F), followed by the respective strain names and genome or contig accession numbers (columns G and H). The insertion elements LE always refer to the IS-element closer to the cas12k gene and RE refers to the opposite end (columns I and J). The detected cas12k and cvkR genes were co…

## Sheet: Table S1
Cas12k	Cas12k_Seq	Cas12k_alternative_Seq	CvkR	CvkR_Seq	CvkR_alternative_Seq	Strain / ID_of_CAST_system	NCBI_nucleotide	LE_position	RE_position
WP_106260488.1	MSQKTIECRLVATEDTRRYLWHLMAEKYTPLVNTLLKQVAQDDHFEEWCHSGNLSVAIVKQFCEKLKEDSQFAGQPGRFYSSAIALVHRIYKSWLALRKRVRNKIAGQTRWLAMLKSDDELTEASGSDLDALKVQAEAILAQIQSQTLLNGQSKPKKSRNQKQPTQTLEPKKNNIPNELFKLYDSVDDVLTRCAIAYLLKNGSKIPDKPEDAKKFAKRRRKTEIRLERLMHTLQRTRLPKGRDLSWHNWLKALEQSAKCVPQDETEAADWQASLLTEAAILPFPVNYETNEDLRWFLNEKGRLCVSFNGLGEHTFEVYCDQRQLHWFKRFLEDQEAKKASKGQLSSSLFTLRSGRLAWQAGKHQGDPWNVHRLSLACVVETRLWTTEGTDQVRQEKAAT…		NA	NA		Stenomitos frigidus ULC18_(1)	1361054249	NA	NA
WP_066425713.1	MSVITIQCRLVAEEDTLRTLWELMADKNTPLINEILAQVGKHPEFETWLEKGKIPTELLKTLVNSLKTQERFASQPGRFYTSAIALVDYVYKSWFALQKRRKRQIEGKERWLTILKSDLELEQESQCSLNIIRTKATEIITEFTPQSDQNNSQKKRKKTTKSTKPSLFQILLNNYEETQDILTRCALAYLLKNNCQISERDENPEEFTRNRRKKEIEIERLKDQLQSRIPKGRDLTGEEWLKTLEVVRANVTQNENEAKAWQAAILRKSADVPFPVAYESNEDMTWLQNDKGRLFVRFNGLGKLTFEIYCDKRHLHYFKRFLEDQELKRNSKNQYSSSLFTLRSGRLAWSPGEEKGEPWKVNQLHLYCTLDTRMWTIEGTQQVVDEKSTKITETLTKAK…		WP_197480172.1	MAEETREVRGRLPKNLKIAFEIACARLEITQTAALEEAIRDWLQKKESSEKQH		Anabaena sp. 4-3	1054660119	20612	1475
WP_103140752.1	MSIITIQCRLVAEEETLRKLWELMTDKNTPLINELLAQVGQHPDFENWLEKGKIPTELLKTLVNSLKTQERFSGQPGRFYTSAIALVDYVYKSWFALQKRKKRQIEGKERWLTILKSDLQLEQESQCSLNAIRTKANEILTKLTPQSEQNKNQRKSKRTKKSAKLQKSSLFQILLNTYEETQDALTRCAIAYLLKNNCQISELDEDLEAFTRHKRKKEIEIQRLKDQLQSRIPKGRDLTGEEWFKILEIATGNVPQNENEAKAWQAALLRKSADVPFPVAYGSGEDMTWLQNDKGRLFVRFNGLGKLTFEIYCDKRHLHYFKRFLEDQEIKRNSKDEYSSSLFTLRSGRLVWLPREKKGEAWKVNQLNLFCALDTRTLTNEGTQQVILEKSAKITKKLT…		WP_192881541.1	MAEETREVRGRLPKDLKIAFEIACARLEVTQTAALEEAIRDWLKKKESSDKQS		Nostoc sp. CENA543	1334999399	3761652	3731206
WP_015225496.1	MSQITIQCRLVASAETRQHVWELMAEQNTPLVNELLKQVAEHPEFETWQQKGKLPAGIVSKLCKPLKEDSRFSGQPGRFYTSATKLVEYIYQSWLALQKRLQWRLNGQKRWLEILKSDQELCQQADCSLETLCHKASEILASFQSSTTKSKKKSKKQKNSSRKSLFDAYDSAEDSLTRSAIAYLLKNNCKIPEQQEDPEKFTQRRRKAEIKVERLTRQIDSSLPKGRDLTGERWLETLITAANKVPQNIEEFKSWQNILLTKPKSVPFPISYETNEDLTWSKNEKGRLCVRFSGLSDHTLQIYCDQRQLKWFQRFYEDQETKRASKNQHSSSLFTLRSARILWQEGTAKGQAWHRNYLSLYCTVDTRLWTAEGTEQVRQEKTDEITKILTNMEEKGDLS…		WP_015225495.1	MRKDFFTSKEVAQITGCTLRQLQYWREKEVVVPTISATGTGRSIYYSHSELIELGIMEYCLAMGFTFDVASWILEQLREAQWDYLNPETTEKLMLHWKRDFTDFKIELFDTDRAIALLNENRLVTPFSFHQIHQQIKTTVNQTRNQGVKTLGEIIEEKLELAGWKIAPHDFIKGDSLVKDKSSKKPQLIDYILLYESQVPIAVIEAKRKYRNPDKGLSEAIKKANQVGVKFAYSSNGKFVVEYDLTTSLQSEAMKNFPTPKELWHRLTVGSETPQLREKSLHNYQQAAIRTALINILQQEKRLLLNLATESGTTQVALRICWYLFQINWNLKEEKRPPKILFLANRQIYLAHLISQAINFFPRDKMAQIQGEVIKGQELYFTTTDDLKCDPWLPNLYQA…		Halothece sp. PCC 7418	428774686	1566524	1548706
OCQ91136.1	MSVITIQCRLVAEEDTLRKLWELMAGKNTPLVNELLAQVGKHPEFETWLEKGKIPTEFLRTLVNSLKTQERFADQPGRFYTSAIALVDYVYKSWFALQKRRKYQIEGKERWLKILKTDLELEQESQCSLNLIRTTANEILTKLTPQSEQNKNQRKGKKTKKSTKPKKPSLFQILLNTYKETEDPLTRCAIAYLLKNNCQISELDEDSEEFTKNRRKKEIEIERLKNQLQSRIPKGRDLTGEEWLKTLEISTANVPQNENEAKAWQAALLRKSADVPFPVAYESNEDMTWLQNDKGRLFVRFNGLGKLTFEIYCDKRHLHYFKRFLEDQELKSNSKNQYSSSLFTLRSGRLAWSPGEEKGEPWKVNQLHLYCALDTRMWTIEGTQQVVDEKSTKITETLT…		no_NCBI_ID	MAEETREVRGRLPKDLKIAFEIACARLELTQTAALEEAIRDWLQKKDSPADGKP		Nostoc sp. MBR 210	1049312867	NA	NA
WP_027402996.1	MSVITIQCRLVAEEDSLRQLWELMTEKNTPFINEILLHLGKHPEFETWLEKGRIPAESLKTLGNSLKTQEPFTGQPGRFYTSAIALVDYLYKSWFALQKRRKNQIEGKQRWLKMLKSDPELEQESQSSLEVIRTKATELFSKFTPQSDSEALRRNQNDKSKKGKKTKKPTKAKTSSIFKILLNTYEEAEDPLTRCALAYLLKNNCQISELDENPEEFTRNKRRKEIEIERLKDQLQSRIPKGRDLTGEQWLETLEIATVKVPQNENEAKAWQAALLRKTANVPFPVAYESNEDMTWLKNDKNRLFVRFNGLGKLNFEIYCDKRHLHYFQRFLEDQEILRSSKRQHSSSLFTLRSGRIAWLPGEEKGEHWKVNQLNFYCSLDTRMLTTEGTQQVVEEKVT…		WP_173401715.1	MAEETREVRGRVPKDIKIAFEIACARLEVTQTAALEEAIRDWLQKKESAAGVK		Aphanizomenon flos aquae NIES-81	653154960	491087	503823
BAQ60380.1	MAVITIHCRLISSKSNRHQLWNLMVQKNTPLINELLLELSQHEDLEQWCELGKLPSGLISKLCDQLKQRAEFEGQPSRFYASAINLVDYIYKSYLRTQRRLRFRLQGQQRWFEMFKSDTEFKNETNFSLTDIRVKARELLDKDLKDSSPDDYFKTYESTSDLLTRSAISYLLKNGRKLPEKPEDYQKFQKRRRKLQIKIEKLQKKIDSSPPMGRNLTNDSWLGMLNLVSNTIPQTDEEAKQWQDQLLRQSKSVPYPVMFNTNEDLRWSKNKKGRLCVTFNGLGKLVFEIYCDQQQLKWFERFYEDQEVKRKGKNQHSSALFTLRSGMLLWQEHEGKQEAWQNNHLTLYCSLDTCFETAEGTELVRQKKVKEVVNLIDAMNNKSERTKTQDAFIKRKQST…		BAQ60381.1	MFLTTKTTSQITGCTLRQLQYWREQGLVVPEVDATGKGRSVFYTRENLVVLMVMQKLLSGGLDYSQACAGLEALKERDPHFTDSNIQSRYLLSHDDDHTMVIMDFEINNIEQCLKKGCAVIPIWLDEIHSSLTEKLDQVSSQEIDHQEIRQKAQQMESEATTRKNRIDQILSALGWNIVDYTPDLDSSQLVNHGVREYPLTTGRADYVLFVNGLLVGIIEAKKILIEPLSALEQAKRYSKGAFEGIGNWEGYRVPFLYSSNGQLIYFLDVREKFNLAREISSFHTPNGLAELLKRKVSFSFEWLENNPIEQNEHLRPYQVEAIASIEKAIAEGRRELLVAMATGTGKTFMIVSSIYRLLVSKRVKRVLFLVDRRALAAQAVRAFASFSTPNGKKFDQEY…		Geminocystis sp. NIES-3708	770466698	869972	884839
WP_099434943.1	MSIVTIHCRLIAPESCRSKIWDLMALKNTPMINEILKRLSNHEELESWYQTGRLPNGLVTKICDQLKNQPPFDNQPSRFYLSVTNLVEYIYKSYLRTQKQLRFRLQRQQRWYQMLKSDSELKQEAQCSLTDIRNKAQSLLAKYTNAESLSQSLFDAYNLAEDKITKVAISYLLKNGCKIPQKVENIERFVKRRRKVKIKIERLEKRIAESSPPMGRDLSDEKWINILNIVCQSAPQTDEQGKQWQDQLLKQSKSVPYPLIFNTNEDLIWSKNEKGRLCVTFNGLTKKGFVFEVCCDQRQLKWFERFYQDQQVKRQSKNQHSSALFSLRSGMLLWREGEGKQKPWTKNHLALFCSLETQFETIEGTELIKQQKVEEVLKTIENIKNKGELTKTQENFLQR…		WP_099435001.1	MTYLTTKQVSKITGCSLRQLQYWREQKVIVPTIDAQGKGKSVLYEKTDLIAVMVMKKLLDTGLDYQRACGVLTNLQEQNLHFSQEINSNNRYLVVLDSDDETINVVEFDVENVKDNVTSGHTFIPLLLDDICRELETKLKDLKIQGQSEDNNIQSLPESEQITRELRIDNVLTQLGWRGVKYHDDLEISQLNGYWVEEYPLATGKADYVLIINGLLVGIIEAKKVSIDPLSAIEQAKRYSRGAFNGVGDWRGYRVPFLYSSNGESIYFLDVRQEHNLTRSISSFHTPSGLLELLNRNETTSNDWLGSNAIEENQYLRPYQVEAIASIEKAIREGKRELLVAMATGTGKTFTIVSSIYRLLVSKRVKRVLFLVDRRALAAQAVRAFASFSTPNGKKFDQE…		Cyanobacterium aponinum IPPAS B-1201_(1)	1273038218	36264	20003
WP_073629970.1	MSVITIQCRLVAEENTLRQLWELMAEKNTPLINELLEQVGQHPNFEKWLKKGEVPEEAIDTIKKSLITQEPFAGQPGRFYTSAVTLVKEIYKSWFALQQERQRKIEGKERWLKMLKSDIELQQESQCNLDIIRNKANEILTSFVANFTENRNQQFKKKGNKTKKNKKEEEESTLFNALFKIYDKTKDCLSQCALAYLLKNNCQVSEIDEDPEEYVKRRRRKEIEIERLRKQLKSRKPKGRDLTGEKWLTALKEATNQVPVDQLEAKSWQASLLKVTSDIPYPVDYESNTDLDWLIHSNDDDIKKKVILVWQIYFLKQLIKSGSYSFIKYLYFQRGCLPKRDVNWLNLKNKAGRIFVKFNGLRKNIINPEFYICCDSRQRHYFQRLCQDWQVWHDNEETY…		WP_198940883.1	MAEETREVRGRLPKDLKIAFEIACARLEVTQTAALEEAIRDWLQKKDSPTGGKSQGS		Scytonema sp. HK-05	1121328441	11337	NA
WP_162327299.1	MSIITIHCNLTAPESTRKQLWELMAQKNTPLINELLRLLAVQDDFEVWCQQGYPPAGLVKRLCDQLKTQDPFKGQPSRFYSSAISQVEYTYKSYLRLQRQLRQRLQGQERWLEILKSDAQLSELTGVSLETIQNKAQQILTQLSSSSNLRQQLFTDYDKTTSPLKQAAISYLLKNGCRIPQKSETPEKFKLRLGKAQHKVKQLREQINANLPLGRDLNDHHRLALLELMDKAVPETNTQAKSWQDQLLKDKASVPYAITYGTNEDLSWGKNDKGRLTVKLSGLGEMTFNIYCDQRQLKWFKRFYEDQQTKRKSKNQHSSALFTLRSAMLGWRQHGDKGNPWNRNRLTFFCSLETRLWSQEGTEIVRQEKATEVAKVLTSMQEKSNLSPNQQAFIKRKES…		WP_162327300.1	MFFTSQQASEITGCTLRQLQYWREKGVVSPAVDATGRGRSVYYSQADLFELMVMKHLLNAGLEYTQAVDVLFGLRHKEPSFTDAPQHSRYLVTRYPEHKMLVIEPFSLDTVQEAMYGGQLVVPLWLDEIHLKLGQKLQQTPGTDMPNTSPLPRSNEDETRRIIDQKLEMSGWEVVSMKPGLGTEKLSRHAVREYPLATGDADYALFVNGLFLGVLEAKKVSINSQSALEQSKRYSRATFDGVGNWRGYRVPFLYSSNGELIYFLDVREKTNICRQLQAFHSPQTLLDMLARDEGRSNAWLKEHPIEHNTRLRPYQVGAIAAIEEAIAVGKRELLVAMATGTGKTFTIVSSLYRLLASKRVQRVLFLVDRKALAAQTVTALRAFDTPNNNKFNQEYEVYS…		Synechocystis sp. CACIAM 05	1806872801	314556	327597
BAB75312.1 [§]	MCFVWYFIFMSQKTIQCRLIASESTRQKLWKLMAESNTPLINELLQQLSKHPDFEKWRRNGKLPSTVVSQLCQPLKTDPSFTGQPSRFYISAIHIVDYIYKSWLTIQKRLQQQLDGKLRWIEMFNSDVELVEISGFSLEAIRTKASEILAITTPESDPKTLLTKRGKTKQSKKSSASNPDRSLSRKLFDAYQETDDILSRSAISYLLKNGCKLNDKEENPEKFAKRRRKVEIQIQRLTDKLTSRIPKGRDLTYSKWLETLFTATTTVPENNAEAKRWQDILLTRSSSIPFPVVFETNEDLVWSTNEKGRLCVHFNGLSDLIFEVYCDSRQLYWFKRFLEDQQTKRKSKNQHSSGLFTLRNGRLAWQQGEGKGEPWNIGHLALYCCVDNRLWTAEGTEQV…	MSQKTIQCRLIASESTRQKLWKLMAESNTPLINELLQQLSKHPDFEKWRRNGKLPSTVVSQLCQPLKTDPSFTGQPSRFYISAIHIVDYIYKSWLTIQKRLQQQLDGKLRWIEMFNSDVELVEISGFSLEAIRTKASEILAITTPESDPKTLLTKRGKTKQSKKSSASNPDRSLSRKLFDAYQETDDILSRSAISYLLKNGCKLNDKEENPEKFAKRRRKVEIQIQRLTDKLTSRIPKGRDLTYSKWLETLFTATTTVPENNAEAKRWQDILLTRSSSIPFPVVFETNEDLVWSTNEKGRLCVHFNGLSDLIFEVYCDSRQLYWFKRFLEDQQTKRKSKNQHSSGLFTLRNGRLAWQQGEGKGEPWNIGHLALYCCVDNRLWTAEGTEQVRQEKAEEIT…	BAB75313.1 [§]	MLYKALMCFRRCFYRMFLMEGKFYTSTEASEITHCSRRQLQYWREKGVIVPTVNSSGKGRNVYYSKADLLALTVMEQLLSTGLNFDLCYAALQTLRKQEPWLFDESVPEEKMKRLMLLPTRSPEQPLQLAEFDKQAALEALCHGQTVIPFWSDRIHQQLRENLKSFSS	MEGKFYTSTEASEITHCSRRQLQYWREKGVIVPTVNSSGKGRNVYYSKADLLALTVMEQLLSTGLNFDLCYAALQTLRKQEPWLFDESVPEEKMKRLMLLPTRSPEQPLQLAEFDKQAALEALCHGQTVIPFWSDRIHQQLRENLKSFSS	Anabaena sp. PCC 7120_(1)	47118302	4361015	4381776
NEU74766.1	MSQITIQCCLIASESTRQKLWKLMAHLNTPLINELLQQLSKHPDFEKWRKNGKLPSTVVNQLCQPLKTDPSFTGQPSRLYLSAIHVVDYIYKSWLAIQKRLQQQLDGKIRWLEMLNSDAELIEISGCSLEAIRTKAAEILAIATPDSDVAAPLTKTGKAKKSKKSSASNPDRSLSHKLFDAYQETDDILSRSAISYLLRNGCKLNDKEEDLEKFAKRRRKVEIQIQRLTDKLTSRIPKGRDLTNAKWLETLFTATTTVPEDNVEAKRWQDILLTRSSSVPFPLIFETNEDLVWSKNEKGRLCVHFNGLSDLTFEVYCDRRQLHWFKRFLEDQQTKRKSKNQHSSGLFTLRNGRLAWQEGEGKGEPWQINRLTLYCCVDNRLWSAEGTEQVRQEKEEEIT…		NEU74765.1 [§]	MFYEKIMCFKRSFYRMILMEGKFYTSTEAAEITHCSRRQLQYWREKGVIVPTVNSSGKGRNVYYSKADLLALTVMEQLLSIGLNFEVCHAALETLREREPWLFDESVPEEKMKRLMLLPTRSPKVGVSPSHEQPLQMAEFDKQAALEALCQGQTVIPFWCDRVHQQLRDNLKSFSS	MEGKFYTSTEAAEITHCSRRQLQYWREKGVIVPTVNSSGKGRNVYYSKADLLALTVMEQLLSIGLNFEVCHAALETLREREPWLFDESVPEEKMKRLMLLPTRSPKVGVSPSHEQPLQMAEFDKQAALEALCQGQTVIPFWCDRVHQQLRDNLKSFSS	Hassallia byssoidea VB512170	JTCM02000049.1	32029	10738
OBQ23770.1	MSQITVQCRLIASESTRQQLWTLMAELNTPLINELLQQLSKHPDFEKWRKDGKFPSTVVSQLCQPLKTDPQFAGQPSRCYLSAIHVVDYIYKSWLTIQKRLQQQLDGKIRWLEMLNSDAELVETSGYSLEAIRTKAAEILAMTTPESDTNVPLTKKRNTKKSKKSSASNPEPSLSHKLFNAYQETDDILSRSAISYLLKNGCKLNDKEEDTEKFAKRRRKVEIQIQRLTDKLTSRIPKGRDLTNSKWLETLFTAITTVPEDNAEAKRWQDILSTRSSSLPFPLIFETNEDLKWSTNEKGRLCVHFNGLTDLTFEVYCDSRQLHWFKRFLEDQQTKRKSKNQHSSGLFTLRNGRLAWQEGEGKGETWQIHRLTLSCCVDNRLWTAEGTEQVRQEKAEDIT…		OBQ23832.1	MEGKFYTSTEAAEITNCSRRQLQYWREKGVIVPTVNASGKGRNVYYSKADLLALSVMEHLLSIGLNFEMCHVALETLRKREPWLFEESVTEDKMKRLMFLPSKSPEQPLQLAEFDQQAALEALCEGQTVIPFWGDRIHELLHQNLKRFTE		Anabaena sp. WA113	1039179294	41004	50079
WP_106367629.1	MSQSTVQCRLIASTSTRQQLWKLMAQLNTPLINEILQQLNKHPDFEKWRKNGKLPSTVVSQLCHPLKTDLRFVGQPSRLYTSAIHVVDYIYKSWLAIHKRLQQQLDGKIRWLEMLNSDAELVETSFCSLEEIRTKAADILAMTTPESDANAPLIERRKTKKSKKSSTSNSDRGLSHKLFDAYQNTEDRLRRSAISYLLKNGCKLKDKEDPEQFAKRRRKLEIQIQRLTEKLTSRIPKGRDLANAKWLETLFTATTTVPEDNAEAKRWQDILLTRSSLLPFPLVFETNEDLVWSTNEKGRLCVHFNGLSDLTFEVYCDSRQLHWFKRFLEDQQTKRKSKNQHSSGLFTLRNGRLAWLEGKGKGEPWELHHLTLYCCVDTRLWTTEGTEQVRQEKTNEITK…		WP_106367628.1	MEEKFYTSTEAAKITNCSRRQLQYWREKGIIVPTVNTTGKGRNVYYSKADLLALAVMEQLLSIGLNFEVCHAALETLREEEPWLFEPSVTQKQMKRLMFLARRSQGQLLRIAEFDKQVALEALCQGQTVIPLWCDHVHQQLRDNLQSYVK		Chlorogloea sp. CCALA 695_(1)	1361175089	163963	153245
WP_096578814.1	MSQITIQCRLIASESTRQQLWKLMAESNTPLINQLLQQLSKHPDFEKWRKNGKLPSTVVYQLCQPLKTHPSFTGQPSRFYLSAIHVVDYIYKSWLAIQKRLQQQLDGKLRWIEMLNSDAELVEISGCSLEAIRTKAAEILAMTTPESGSNISVTKTRKTKKSKNSNSSASNSDRSLSHKLFDAYQETDDILSRSAISYLLKNACKLNNKEEDPEKFSQRRRKVEIQIQRLTDKLISRIPKGRDLTNSKWLETLFTATTTVPEDNTEAKRWQDVLLTRSSSVPFPVIFETNEDLVWSKNEKGRLCVHFNGLSDLTFEVYCDSRQLHWFKRFLEDQQTKRKSKNQHSSGLFTLRNGRLAWQEGKGKEEPWNIHHLTLYCCVDNRLWTEDGTEQVRQEKAEE…		WP_096578816.1 [§]	MLYKILMCFRRCFYRMFLMEGKFYTSTEASEITHCSRRQLQYWREKGVIVPTVNSSGKGRNVYYSKADLLALTVMEQLLSIGLNFEVCHAALVTLREQEPWLFDESVPEEKMKRLMLLPTRSPEQPLQLAEFDKQVALEALCHGQTVIPFWSDRIHQLLRDNLKSFSS	MEGKFYTSTEASEITHCSRRQLQYWREKGVIVPTVNSSGKGRNVYYSKADLLALTVMEQLLSIGLNFEVCHAALVTLREQEPWLFDESVPEEKMKRLMLLPTRSPEQPLQLAEFDKQVALEALCHGQTVIPFWSDRIHQLLRDNLKSFSS	Tolypothrix tenuis PCC 7101_(1)	1248082491	5226451	5252835
BAY29310.1	MSQKTIQCRLIASESTRQKLWKLMAELNTPLINELLEQLSKHPDLEKWRKNGKLPSNVVYQICQPLKTHPSFKGQPSRFYLSAIHVVDYIYKSWLAIQKRLQQQLDGKLRWIEMLNSDAELVEISGCSLEAIRTKAAEILAMTTLESSSNTSVTKTKNTKKSKNSNSSASNSDRSLSHKLFDAYQETDDILSRSAISYLLKNGCKLNNKEEDPEKFAQRRRKVEIQIQRLTDKLTSRIPKGRDLTNSKWLETLFTATTTVPEDNTEAKRWQDILLRRSSSVPFPVVFETNEDLVWSTNEKSRLCVHFNGLSDLTFEVYCDSRQLHWFKRFLEDQQTKRKSKNQHSSGLFTLRNGRLAWQQGEGKGEPWQLHRLTLYYRQDRCAPSNKGADVLL		BAY29309.1	MEDKFYTSTEASEITHCSRRQLQYWREKGVIVPTVNSSGKGRNVYYSKADLLALTVMEQLLSIGLNFEVCHAALVTLREQEPWLFDEFFPEEKMKRLMLLPTRSPEQPLQLAEFDKQVALEALCHGQTVIPFWSDRIHQQLRDNLKNFSS		Nostoc carneum NIES-2107_(1)	1210109048	NA	1429749
BAY29339.1	MSQITIQCRLVASESTRQQLWKLMADLNTPLINELLEQLAKHPDFEKWRQKGKLPASVVMKLCQPLKNDPRFAGQPSRFYISAIHIVDYIYKSWLAIQKRLQQQLDGKTRWLEMLNSDPELVEASASSLEVIRTKAAEILAIAMTASDSDNSSPNGKKSKKAKKASSNPKRKLFNTLFDAYQETEDVLSRSAISYLLKNGCKLSDKDEDPEKFAQRRRQLEIQIQRLTEKLTSRIPKGRDLTHAKWLETLFTATTTVPKDNAEAKHWQDILLTRSSSVPFPVVFETNEDLVWSTNEKSRLCVHFNGLSDLTFEVYCDSRQLHWFKRFLEDQQTKRKSKNQHSSGLFTLRNGRLAWQQGEGKGEPWQLHRLTLYCCVDNRLWTAEGTEQVRQEKAEEITK…		BAY29338.1	MEAKFYTSTEAAEITKCSRRQLQYWRDKGVVIPTVNTTGKGRNVYYSESELLALFLMHYLLSFGLSFEVCREALTIFREKEPWMFDQFFPQEKMKRLMLLTSQSEEQDLKLVDFNPKVALEAICQGQAVIPLWCDRIHELLHQNLKSSTQEISKSSSVEI		Nostoc carneum NIES-2107_(2)	1210109048	1475711	NA
WP_012411901.1	MSQITIQCRLIASESTRQKLWKLMATLNTPLINELIEQLGKHPDFENWRQQGKLPTTVVSQLCQPLKTDPRFVGQPSRLYMSAIHIVDYIYKSWLAIQKRLQQQLDGKMRWLEMLNSDVELVETSGSSMGAIRTKASEILAKAMPTSDSDSSQPKTKKGKEAKKSSSSSSDRSLSNKLFEAYQETEDILSRSAISYLLKNGCKLSDKEEDSEKFAKRRRQVEIQIQRLTEKLISRMPKGRDLTNRKWLETLFTATTTFPEDNAEAKRWQDILLTRPSSLPFPLVFETNEDMVWSKNQKGRLCVHFNGLSDLSFEVYCDNRQLHWFQRFLEDQQTKRQSKSQYSSGLFTLRNGHLVWQEGEGKSEPWNLNRLNLYCCVDNRLWTADGTEQVRQEKAEEIS…		WP_012411902.1	MEEKFYTSTEAAEITNCSRRQLQYWRDKGVVIPTVNTTGKGRNVYYSVADLLTLTVMHYLLSVGLSFEVCREALAMLQDKEPWLFEEFVSKKKMRRLMLISNASQQKYLTLAEFDKEAALEALCQGQTVIPFWCDRIHEVLHQNLKRFSE		Nostoc punctiforme PCC 73102	186680550	6982486	7010421
WP_029636312.1	MSQITIQARLISFESNRQQLWKLMADLNTPLINELLCQLGQHPDFEKWQQKGKLPSTVVSQLCQPLKTDPRFAGQPSRLYMSAIHIVDYIYKSWLAIQKRLQQQLDGKTRWLEMLNSDAELVELSGDTLEAIRVKAAEILAIAMPASESDSASPKGKKGKKEKKPSSSSPKRSLSKTLFDAYQETEDIKSRSAISYLLKNGCKLTDKEEDSEKFAKRRRQVEIQIQRLTEKLISRMPKGRDLTNAKWLETLLTATTTVAEDNAQAKRWQDILLTRSSSLPFPLVFETNEDMVWSKNQKGRLCVHFNGLSDLIFEVYCGNRQLHWFQRFLEDQQTKRKSKNQHSSGLFTLRNGHLVWLEGEGKGEPWNLHHLTLYCCVDNRLWTEEGTEIVRQEKADEIT…		WP_029636314.1	MEGKFYTSTEAAQITNCSRRQLQYWRDKGVVVPTVNTTGKGRNVYYSISDLLVLTVMHYLLSVGLSFEVSRQTLVILRQKEPWLFEEFVPKEKMKRLMLLTTCSLEQPLTLAEFDKEAALEALCQGQTVIPFWCDRIHQQLRDNLKSFSS		Scytonema hofmanni UTEX 2349	657935980	4865812	4892528
PZO41941.1	MSNITIQCRLITNESTRQMLWQLMAERNTPLVNELLEQVGQHPKFDAWRQSGRLPTHVVREFCKVLKVDSRFIGQPARFYESAIRVVDYIYKSWLAIQRKLQRKLEGKIRWLEMLKSDIELAENCDRDLEAIRTKATEILSQITTASVKSNTQQKGSKNKKTKKNTVSEGNRSISSILFDQYAEYEDSFSKCAIAYLLKNGCKVNSNEEDPDKFKKRHNVLKNQVKRLTEQLIARMPKGRDLTGQSWFETLITAATTAPENEEEASSWQANLLRKSIAVPFPITFETNEDMSWSVNQKGKLCVRFNGLSECSFEVYCDKRQIHWFKRFLEDQQIKRDSKDQFSSALFTLRSGRLAWQENEDKGDPWTVHRLTLFCTIDTRLWSAEGTEQVRQEKATEIV…		PZO41940.1	MSSNFFTSTETAKITGCTSRQLQHWRLKGVIVPTVNTAGTGRNVYYTVSDLLQLTVMQYFLTAGLSFELSQETLDEVKKVEPDFFDKPFEYKAMRKFMLWQSEYGKKPTFLDFDPQKALSAICNGQPVIPFWTGIVGQKLALTLRAFGQRLQTFEEYKTESQKYTQAIKQHEKVFLPPNQIVIRR		Pseudanabaena frigida ULC066bin1	1404799822	115471	89444
WP_036484397.1	MSQNAIQCRLIAPETTRRQQWQLMAEKNTPLINELLKQLAEHPELETWKRKGKIPPGTVKNLCQPLRTCPQYINQPGRFYSSVISLAEYIYRSWLKLQRRLIFRLNGQQRWLQMLKSDEELVAESGRSLKEIEAKASEALDRLNREENPSISNRLFDLYDETEDILIRSAIVYLLKNGCKIRQKPEDPKKFARRRRKTEIRVKRLQEKLNGKAPQGRDLTGEKWLNTLFTATSQVPQDEAQAKSWQDILLTKSKLVPYPIVYESNEDLTWSKNERGRLCVKFNGLSDHTFQIYCDRRQLKIFNRFYEDQQIKKASKNSHSSALFTLRSATIAWQEGKGKGEPWNVNRLILYCTFDNLLLTTEGTEVVRQEKAEAIANTLTKIKEKGDLNQKQQAFIRRK…		WP_052055737.1	MGEPFYTSTEASLITGCSRRQLQYWRKQGVVVPTVNPGGKGRNVYYTESDLLILSVMKYLLSLGLNFDVSLKVLETLREKEILCFLDWSLSKNTKKRFMLVLDTEEKNTIHITNFDTELAVQKLQEGFAIAPFGRDRIYQKLQDNLQAFYRNRKSLKGDRRTKN		Myxosarcina sp. GI1	738536720	90415	122076
WP_006529102.1	MSTITIQCRLVAPETTRQALWELMAQKNTPLVSELLRQVAQHFDFETWRQKGKLEVGIIKKLCEPLKKDPRFSNQPARFYTSAIALVDYIYQSWLKLQQRLQRKLEGQNRWLVMLKSDEELVQISHSSLETIQAKATEILSSLKRDPKSTKKGKNSQKNKSLFTQLYDLYDKTENTLTRCGICYLLKNGCKISKKPEEPEKFAQRRRKVEIKIERLIEQIEGSIPQGRDLTADCWLETLNIAANTATVDATEVKSWQDQLLSQSKSIPYPVAYETNEDLTWSINEKGRLCVRFNGLGKHTFQIYCDQRQLKWFQRFYEDQQIKKNGKNQHSSALFTLRSGRIVWQEGKSKGKPWNIHSLALHCSLDTRFWTEEGTEQIQQEKSQQFQRNRLRMKPELTF…		WP_006529103.1	MEDNFFTSTEASKITGCSRRQLQYWREKGVVVPTVNASGKGRNVYYSVSDLLQLMVMGYLLSVGLSFDTAQESLEMLKEHHPKIFKTDASSEDLKRLMILPNPKGLELKVFDPEEAFMRINSQALPLVPFSGEMIHKRLKITLESLKHDPSSKYMVGK		Gloeocapsa sp. PCC 73106	443321888	29738	NA
WP_006509624.1	MSNITIQCRLIAPEETRRQLWQMMVEKNTPLINELLRLLAEHPDLETWKRRGNTPPGTVKNLCLPLRTDPQFVGQPGRFYSSAISLVEYIYKSWLKLQQRWEFQLQGQERWISMLKSDEELEVYCDHTLEDIKLKATQILDNDLTEENRGISNQLFSLYDETEDTFTRNAIAYLLKNGCKIRQKPEDPKKLAKRRRKTEIKIARLTEKLNGKAPQGRDLTGQTWLDTLLTATTQVPQDEAQAKSWQDKLLTEPKSVPYPIAYESNGDLTWSKNEKDRLCVKFNGLGKHIFQIYCDKRQLTVFQRFYEDQEIKKASKNNHSSALFALRSARIFWQERKGKGKSWDVNRLILRCTFETLLLNAEGTELIRQEKANAIAKTLTDIKEKGDLNQKQQAFVKRK…		WP_006509625.1 [§]	MASLLIMGEAFFTSTEASKITGCSRRQLQYWRRQGVVVPTVNPGGKGRNVYYSESDLLILAVMEYLLSIGLNFDTSLTALNILMTKNLFLSAKSWTKDQTRLMFFLSLDNEEVRLENFNVELAKQKLEEGYPVIPFCCDRIYDKLQSNLKYFHQGQSDISCRENN	MGEAFFTSTEASKITGCSRRQLQYWRRQGVVVPTVNPGGKGRNVYYSESDLLILAVMEYLLSIGLNFDTSLTALNILMTKNLFLSAKSWTKDQTRLMFFLSLDNEEVRLENFNVELAKQKLEEGYPVIPFCCDRIYDKLQSNLKYFHQGQSDISCRENN	Xenococcus sp. PCC 7305	443326553	NA	NA
BAB74390.1	MSRDRKKGSKSPSLRTIRCHLHTKEDVLRKVWEEMTQKNTPLIVELLKSVSEQPEFETNKENGKITKKEITNLRKSLTQDSGRLYSSVDNLVQEVYSAWLTLYQKRKKQKEGKEYFLNNILKSDIELVEESNCDLQILRAKAQEIISNPQDILRQITIDNPKDKPTKSIQKRVRKNINASNSDTAKNNILNSQEKTTEENISKSVIEILYEIHKTTQDTIIRCAVTYLIKNYTKISDTEEDLNKLKERRAEKEIEIKRLEKQIQDSRLPNGRDITGARYLEAFDKLINQVPKNNEEFANWIADASRKISNLPYPIDYLYSDLTWYKNQDGKIFVYFNGWSKYHFQICCNKRQRHFFERFLEDHKAWKESEKGEVKLSGSLVTLRCVQLLWQQGEGKGEP…		BAB74389.1	MSQSDRVQTSIYFPKDIHDALVRWAQEEDRPISNLVVRIVSKAVEEREKQNPPQ		Anabaena sp. PCC 7120_(2)	47118302	NA	3274959
WP_069072561.1	MSSDRKKKSTIPVHRTIRCHLDASEDILRKVWEEMTQKNTPLILKLLKSVSEQPEFEANKEKGEITKKEIVKLRKNVTKNPELEEQSGRLRSSAESFVKEVYSSWLTLYQKRKRQKEGKEYFLKNILKSDVELIDESNCDLETIRSKAQEVLSQPEEFIKQLTINDEDVKPTKSARKRVNKNINNKSTDAEQRKDSSSTNNVDKNKLETLTNILYEIHKQTQDILTRCTVAYLIKNHNKISNLEEDIQKLKKRRNEKIVQIKRLENQIQDNRLPSGRDITGERYSEAFGNLINQVPKNNQEWEDWIANLSKKISHLPYPIDYLYGDLSWYKNDVGNIFVYFNGWSEYHFKICCNKRQRHFFERFLEDYKAFKVSQKGEEKLSGSLITLRSAQLLWQQGE…		WP_084227262.1 [§]	MMNWQQIFVVLMSQSDRVQTSIYFPKDIHEALVRWAEEEDRPISNLVVRLVSKAVEEREKKQNPPQ	MSQSDRVQTSIYFPKDIHEALVRWAEEEDRPISNLVVRLVSKAVEEREKKQNPPQ	Nostoc sp. KVJ20	1060048798	32773	9132
WP_096566883.1	MSRNSKKDFKSPILRTIRCHLYASEDVLRKVWEEMTQKNTPLIVQLLKSVSEQPEFEANKENGKITKKEITELRKSLTQDSDLDKQSGRLRSSADTFVTEVYSSWLTLYQKRKSQKERKEYFLNNILKSDFELVEESNCDLQTIRFKAQEILSQPEKLLQQIIIENGNKAEINSSRKKGIKNSNNQNSNTKENANEGNSKTLTDILYEIHKKTRDIVTQCAVAYLIKNYNQVSELEEDIQKLKKRRSQKEIEIKRLEKQIKNNQLPNGRDISGKTYIQALDNLINQVPNDNEEYANWLACLSKKISALPYPIDYLYGDLSWYKNEEEKIFVYFNGWADYHFQIHCNKRQRHFFERFLEDHEAFKKNEKSEEKLSGGLITLRSAQLLWQQGEGKGEPWKV…		WP_096566881.1	MMNWRQIFLELMSQSDRVQTSVYFPKDIHEALVRWAEDEDRPISNLVVRIVTKAVEEREKQQNPPQ		Scytonema sp. NIES-4073	1248067950	7132747	7106143
BAY94246.1	MSRDRQKKSTSPIHRTIRCHLHASEDVLRKVWEEMTQKNTPLIVQLLKSVSEQPEFETNQEKGTISKKEITKLRKALTNDSDLQQQSGRLGSSADSLVTEVYTSWLTLSQKIKKQKEGKEYFLNNILKSDVELVQESNCDLQTIRCKAQDILSQPKEFLEQITNHDAVLNQTKSARKKVQNSSNEINASKQRENSDYQENVDKNIPETLTEILYKIHKITQDILTQCAVAYLIKNHNQVSDLEEDIKKLKKRRTEKQVQIKRLEEQIQKNKLPNGRDITGERYNHAFDNLINQVPQNNEEFAEWIASLLNKVSDLPYPIDYLYSDLTWYKNEQRKICVYFNGWAKFHFQICCNKRQLHFFKRFLEDYKALKESEKGEIKLSGSLVTLRSVQLLWQQGEG…		BAY94247.1	MSQSDRVQTSIYFPKEIHEALVRWAQEEDRPISNLVVRIVSKAVEEREKQNPPQ		Fremyella diplosiphon NIES-3275_(1)	1210168952	7991159	8001403
WP_103125278.1 [§]	MTQKNTPLIVQLLKLVSEQPEFEANKENGTITKKEITELRKPLTDDSDFQEQSGRLCSSADSLVKEVYSSWLKLYQQRKKQKEGKEYFLNNILKSDAELVQESQCNLQTIREKAQEILNNPEKFSEQVTNNQNVKQKKSLRKKSNNDNKEIKQSKNQAYKENEDESSPNTLTDILYKIHREAQDILTRCAVSYLIKNNNKVSDIEEDITQLEKRRIQKQVEIKRLEEQLKNSKLPKGRDITGTKSSQAFNNLINQIPKDDEEFAEWVATFLRKISKIPYPIDYGSSDLSWGKDKKGNIFVYFNGWAKYHFQICCNKRQLHFFERFLEDYKAFKASEKGEEKLSGSLVTLRSAQLLWQQGEGKGEPWKVNKLALHCTYDARLCTAEGTEEVRQEKTDKAQ…	MSAIYRTIRCYLYASEDILRKVWEEMTQKNTPLIVQLLKLVSEQPEFEANKENGTITKKEITELRKPLTDDSDFQEQSGRLCSSADSLVKEVYSSWLKLYQQRKKQKEGKEYFLNNILKSDAELVQESQCNLQTIREKAQEILNNPEKFSEQVTNNQNVKQKKSLRKKSNNDNKEIKQSKNQAYKENEDESSPNTLTDILYKIHREAQDILTRCAVSYLIKNNNKVSDIEEDITQLEKRRIQKQVEIKRLEEQLKNSKLPKGRDITGTKSSQAFNNLINQIPKDDEEFAEWVATFLRKISKIPYPIDYGSSDLSWGKDKKGNIFVYFNGWAKYHFQICCNKRQLHFFERFLEDYKAFKASEKGEEKLSGSLVTLRSAQLLWQQGEGKGEPWKVNKLALH…	WP_103125279.1	MSQSDRVQTSIYFPKDIHEALVRWAQEEDRPISNLVVRIVSKAVEEREKQNPPQ		Nostoc cycadae WK-1	1334984313	269329	299908
BAY18180.1	MTRYCQNNSTQPILRTISCYLSGREEALRKAWEETAQVNTPLIVDLIKAVPEQPEFETHKETGTITKKKIKELRQSLTQDSDRTYSSADSLVKEVYASWLKLYQTRKIQKEGKEYFLKNILKSDAELVEKSNCELHTIRCKAKEILSQVEEFIDKINNSELQITQTRSAKKKNNQNNNSINTILNKLFSKKINKSVKQSLNYTLYEIHRESSDSLTQCAVAYLIKNGNKVNEAEENLVQLNKRRAAKEVEIKRLETQIQNTRLPNGRDITGAKSSQAFNNLINQVPNDDEEFAEWTATFLKKISNLPYPINYLYGDLTWYKNEK		BAY18181.1	MMDWRQILLELMSQSDRVQTSIYFPKEIHEALVRWAEEEDRPISNLVVRIVSKAVEERNKQQNPPQK		Anabaenopsis circularis NIES-21	1210095109	4668763	4698775
WP_096573641.1	MSRDRQKKSTSPIHRTIRCHLHASEDVLRKVWEEMTQKNTPLIVQLLKSVSEQPEFEANQEKGTISKKEITKLRKALTNDSDIQQQSGRLGSSADSLVTEVYTSWLTLSQKIKKQKEGKEYFLNNILKSDVELVEESNCDLQTIRCKAQDILSQPKEFLEKIINNDAVLNQTKSARKKVQNSSNEINASKQSENSDLKENVDKNIPQTLTEILYKIHKITQDILTQCAVAYLIKNHNQVSDIEEDIKNLKKRRTEKQVQIKRLEEQIHNKKLPNGRDITGERYNQAFDNLINQVPQDNEEFAEWIASLSTKVSHLPYPIDYLYSDLTWYKNEQEKICVYFNGWAKFHFQICCNKRQLHFFKSFLEDYKALKESEKGETKLSGSLVTLRSVQLLWQQGEG…		WP_010996845.1	MSQSDRVQTSIYFPKDIHDALVRWAQEEDRPISNLVVRIVSKAVEEREKQNPPQ		Tolypothrix tenuis PCC 7101_(2)	1248082491	441124	458067
WP_118170709.1	MSQITIQCLLVALESSRQQLWKLMAELNTPLINELLRQVSQHPEFETWRQKGKHPTSIVKGLCQPLKTDPRFIGQPGRFYTSAIALVNYIYKSWFALMKRSQFQLEGKIRWLEMLNSDVELLESSGVSLDSLRTKAAEILAQFSSLNTAETPSTNVKKAKKRKKAQNSDSDRNLSKNLFETYRNTEDNLTRCAISYLLKNGCKINDKEEDAKKFAQRRRKLEIQIERIREQLETRIPKGRDLTVIKWLETIVVATHTVPTNEAEAKSWQDSLLRQSSKVPFPVAYESNEDMTWFKNQFGRICVKFNGLSEHSFQVYCDSRHLHWFQRFLEDQQIKKNSKNQHSSSLFTLRSGRIAWQEEEGKGDPWNVNRLTLYCSVDTRLWTTEGTNQVREEKAEEIA…		WP_118170712.1	MQETFFTSKEAAEITGCTLRQLQYWRERGVIVPVISDTGTGRSIYYSKSNLLELAAMSYWLSVGLSFDIASTTLKKLKDQEPELFTSGKGKRFMLLSQAHERSLELVEFDRKKAIASLDEGKPVIPVWLDVIYSRLELKLSNKKS		Nostoc sphaeroides CHAB 2801	1473732401	6460765	6478175
WP_094340324.1	MSQITIQCRLVASESSRHQLWKLMAELNTPLINELLHRVNQHPEFETWRQKGKHPTSVVKELCEPLKTDSRFIGQPGRFYTSAIALVNYIYKSWFALMKRSQFQLEGKNRWLQMLNSDVELIESSGVSLDSLRTKAAEILAQFASLNTAETPSTNVKKAKKRKKAQNSDSDRNLSKNLFESYPKTEDNLTRCAISYLLKNGCKINDKEEDAKKFVQRRRKLEIQIERIREQLETRTPKGRDLTATKWLATLFTATHNVPTNEAEAKSWQDSLLRQFSKVPFPVAYESNEDMTWFKNQFGRICVKFNGLSEHSFQVYCDSRQLHWFQRFLEDQQIKKNSKNQHSSSLFTLRSGRLAWQEEEGKGDPWKANHLTLYCSVDTRLWTTEGTNQVREEKAEEIA…		WP_094340322.1	MQETFFTSKEAAEITGCTLRQLQYWRERGVIVPVISDTGIGRSIYYSKSNLLELAAMSYWLSVGLSFDIASTTLKKLKDQEPELFTSGKGKRFMLLSQAQERSLELVEFDRKKAIASLDAGKPVIPVWLDEIYQRLAVKLDK		Nostoc sp. 'Peltigera membranacea cyanobiont' 232_(1)	1231446969	100761	82183
BAY94972.1 [§]	MLNIYAIIKHMCFIDERMSQITIQCRLVASESTRQQLWKLMAEKNTSLINELLVQVAQNPEFETWRQKGKHPSSIVKELCQPLKTDPRFIGQPARFYTSAIATVNYIYKSWFALIKRSHFQLEGKIRWWEMLKSDTELVELSGMTIESLRSKAAEILAQFTLKSDTVEAKPATENKRKKTKKSKASDSDRSMSKTLFEAYHDTKDILTSCAISYLLKNGCKINDKEEDTQKFAKRRRKLEIQIERLREQLEARIPKGRDLTDAKWLETLLLATRNVPKSELEAKSWQDDLLKKSSKLPFPVGYESNEDMTWFWQFSLYNIAINLRFFWLWIYIDYLIAIVFLRDVLQIEKQWLHNLEINNTSLLIKLWNLALELNCLASILFLHESLHKYKRRLCVQFN…	MSQITIQCRLVASESTRQQLWKLMAEKNTSLINELLVQVAQNPEFETWRQKGKHPSSIVKELCQPLKTDPRFIGQPARFYTSAIATVNYIYKSWFALIKRSHFQLEGKIRWWEMLKSDTELVELSGMTIESLRSKAAEILAQFTLKSDTVEAKPATENKRKKTKKSKASDSDRSMSKTLFEAYHDTKDILTSCAISYLLKNGCKINDKEEDTQKFAKRRRKLEIQIERLREQLEARIPKGRDLTDAKWLETLLLATRNVPKSELEAKSWQDDLLKKSSKLPFPVGYESNEDMTWFWQFSLYNIAINLRFFWLWIYIDYLIAIVFLRDVLQIEKQWLHNLEINNTSLLIKLWNLALELNCLASILFLHESLHKYKRRLCVQFNGLSKHTFKVYCDFRDLH…	BAY94971.1	MQETFFTSKQAAEITGCTLRQLQYWREKGVVVPVIGETGTGRSIYYSKPNLMELAAMLYFLSMGLSFDIASTTLKTLKYKEPELFESGKGSRWMLLWQGHKRSLNLIVYDREQAIASLDEGKPVIPVWLDVIYQQLINKLAG		Fremyella diplosiphon NIES-3275_(2)	1210168952	8872961	8835327
WP_099067416.1	MSQITIQCRLVGSESTRQQLWKLMAEKNTPLINELLLKVAQQPEFESWRQKGKHPAKIVKELCEPLKTDPRFIGQPGRFYTSAIALVNYIYKSWLALMKRSQSQLEGKMRWLEMLKSDAELVEASGVTLENLRTKAAEILAQLAPQSDTVEAKSPKGNKRKKTKKSKKSDGDCAERTLRERSISQILFEAYRNTEETLTRCAIGYLLKNGCKISNQDEDADKFAKRRRKLEIQIERLKQQLEARIPKGRDLTDAKWLETLLLVTNNAPENEAEAKFWQDSLLKQSSKLPFPVAYETNEDMTWFKNERGRICVKFNGLSEHSFQVYCDSRHLHWFQRFLEDQQIKHNSKNQHSSSLFTLRSGRIAWQEGEGKGDHWKVNRLILYCSVDTRLWTAEGTNLI…		WP_099067417.1	MQETFFTSKQAAEITGCTLRQLQYWREKGVVVPVIGETGTGRSIYYSKPNLMELAAMLYFLSMGLSFDIASTTLKTLRDKEPELFEFGKGSRWMILFEGHKRSLNLVVYDREQAIASLDEGKPVIPVWLDVIHQQLTKKLA		Nostoc linckia z1	1268872875	39159	66724
BBD58003.1	MSIITIQCRLVAEEETLRQLWELMTDKNTPLVNELLAQVGKHPDFETWLEKGKIPTELLKTLVNSLKTQERFVGQPGRFYTSAIALVDYVYKSWFALQKRRKRQIEGKERWLTILKSDIQIEQESQSTLNVIRTKATEILTKFTPQSEQNHNQRKSKRTKKKSTNSKKSSLFQILLNTYEETQDTLTRCALAYLLKNNCQISELDEDPEEFTRKKRKKEIEIQRLKDQLQSRIPKGRDLTGEEWLETLELARANVPQNEKEAKAWQAALLRKSADVPFPVAYESNEDMTWWQNDKGRLFVRFNGLGKLTFEIYCDKRHLHYFKRFLEDQEIKRNSKNQYSSSLFTLRSGRLSWRPGEEKGEPWKVNQLHLHCALATRMWTTEGTQQVVNEKTTKITKTL…		BBD58004.1	MAKETREVRGRLPKNLKIAFEIACARLEVTQTAALEEAIRDWLKKKESSDKQS		Nostoc sp. HK-01	1373819911	924438	953232
GCL44115.1	MSVITIQCRLVADESSLRQLWELMTEKNTPFINEILIQIGKHSEFETWLEKGSIPAELLKKLGNSLKTQELFTGQPGRFYTSGITLVDYLYKSWFALQKRRKNQIEGKQRWLKMLKSDQELEQESECSLEVIRTKAAELLTKFALQSDENDHQKKGKKTKKAPKYKTSSIFKILLNTYEDAEDPFTRCALAYLLKNNCQISEVDENPEEFTRNKRRKEIEIERLKDQIQSRIPKGRDLTGEEWLETLKIATFNVPQNENEAKAWQAALLRKTANVPFPVAYESNEDMTWLRNDNNRLFVRFNGLGKLTFEIYCDKRHLHYFQRFLEDQEIKRNSKNQHSSSLFTLRSGRISWLPSEEKGEHWKVNQLNFYCSLDTRMMTCEGTKEVVEEKVTKITEILT…		GCL44114.1	MTEETREVRGRVPKDIKIAFEIACARLEVTQTAALAEAIKDWLQKKDSPSGGKSQGS		Dolichospermum planctonicum NIES-80	1593815924	9250	NA
AFY45233.1	MSVITIQCRLVAEEDILRQLWELMADKNTPLINELLAQVGKHPEFETWLDKGRIPTKLLKTLVNSFKTQERFADQPGRFYTSAIALVDYVYKSWFALQKRRKRQIEGKERWLTILKSDLQLEQESQCSLSAIRTKANEILTQFTPQSEQNKNQRKGKKTKKSTKSEKSSLFQILLNTYEQTQNPLTRCAIAYLLKNNCQISELDEDSEEFTKNRRKKEIEIERLKNQLQSRIPKGRDLTGEEWLKTLEISTANVPQNENEAKAWQAALLRKSADVPFPVAYESNEDMTWLQNDKGRLFVRFNGLGKLTFEIYCDKRHLHYFKRFLEDQELKRNHKNQYSSSLFTLRSGRLAWSPGEEKGEPWKVNQLHLYCTLDTRMWTIEGTQQVVDEKSTKINETLT…		AFY45234.1	MAEETREVRGRLPKDLKIAFEIACARLELTQTAALEEAIKEWLKKHESTSSDK		Nostoc sp. PCC 7107	427357970	5473874	5501374
BAZ48772.1	MSVITIQCRLVAEEETLSQLWELMADKNTPLINELLAQVGKHPDFETWLEQGKIPTELLKTLVNSLKTQERFAGQPGRFYTSAIAIVDYVYKSWFALQKRRKHQIEGKERWLTILKSDQQLEQESQCSLNVIRTKAIEILSQFTPQSDQNKNQRKSKKTKKSAKLHKSSLFQILLNTYEQTQDPLTRCAVAYLLKNNCQISELHEDPEKFTRNRRKKEIEIERLKDQLQGRLPKGRDLTGEEWLETLEIATDNVPQNENEAKAWQAALLRKSAEVPFPVAYESNEDMTWLKNDKGRLFVRFNGLGKLTFEIYCDKRHLHYFQRFLEDQEIKRNSKNQYSSSLFTLRSGRLAWLPGEEKGEPWKVNQLHLYCALDTRMWTTEGTQKVINEKSIKITETLT…		BAZ48771.1	MAEETREVRGRLPKDLKIAFEIACARLEVTQTAALEEAIRDWLKKKESSDKQS		Nostoc sp. NIES-4103_(1)	1210228378	1685771	1655678
WP_104387148.1	MSQITIQCRLLASESTRQQLWQLMAEKNTPLINELLMQMGKHPEFETWRQKGKHPTGVVKELCEPLKTDPRFMGQPARFYTSATASVNYIYKSWFALMKRFQSQLDGKLRWLEMLNSDTELEAASGVSLDVLQTKSAEILAQFAAQNPAETQPAKGKKGKKSPTSDSERNLSKNLFDAYSNTEDNLTRCAISYLLKNGCKISNKAENTDKFAQRRRKVEIQIQRLTEKLAARIPKGRDLTDTLRLETLFNATQTVPENETEAKLWQNILLRKSSQVPFPVAYETNEDLVWFKNQFGRICVKFSGLSEHTFQIYCDSRQLHWFQRFLEDQQIKKDSKNQHSSALFTLRSGRISWQEGQGKGEPWNIHHLTLYCSVDTRLWTEEGTNLVKEEKAEEIAKTI…		WP_104387113.1	MQETFFTSKEAAQITGCTLRQIQYWREKGIVVPVISETGTGRSIYYSRSNLVELAALVYWLSTGISFDVACFILKQLKEQEPELFISGHGKRFMLLLSQDDSLSLVEFDRKMAIASLDEGKAVIPVWLDVIYQGLASKLPK		Cuspidothrix issatschenkoi CHARLIE-1	1347797356	15134	3579
WP_127054896.1	MSQITIQCRLVASESTRQQLWQLMAEKNTPLINELLSQIGKHAEFETWRQKGKHPTGIVKELCEPLKTDPRFMGQPARFYTSATASVNYIYKSWFALMKRFQSQLDGKLRWLEMLNSDAELVEASGVSLDVLQTKSAQILAQFAPQNPAETQPAKGKKTKKGKKSPTSDSERNLSKNLFDAYSNTEDNLTRCAISYLLKNGCKISNKAENPDNFVQRRRKVEIQIQRLTEKLAARIPKGRDLTNTIRLETLFNATQTVPENETEAKFWQNILLRKSSQLPFPVAYETNEDLVWFKNQFGRICVKFSGLSEHTFQIYCDSRQLQWFQRFLEDQQIKKNSKNQHSSALFTLRSGRISWQEEQGKGEPWNIHHLTLYCSVDTRLWTEEGTNLVKEEKAEEIA…		WP_127054897.1	MQETQKTQETFFTSKEAAQLTGCTLRQIQYWREKGIVVPVISDTGTGRSIYYSRSNLVELAAMVYWLSTGISFDIACFILKQLKEQEPELFISGRGKRFMLLLSQDDSLSLVEFDKKRAIASLDEGKAVIPVWLDVIYQGLAKKLAD		Trichormus variabilis SAG 1403-4b	1547455574	231349	243974
WP_053540473.1	MSQITIQCRLVASESTRQQLWQLTAEKNTPLINELLSQIGKHPEFETWRQQGKHPTGIVKELCEPLKTDPRFIGQPARFYTSATASVNYIYKSWFALMKRFQSQLDGKLRWLEMLNSDTELVEASGVSLDILQTKSAEILAQFAPQNPAETQPAKGKKGKKSPNSDSDRNLSKNLFDGYSNTEDNLTRCAISYLLKNGCKISNKAENTDKFAQRRHKVEIQIQRLTEKLAARIPKGRDLTDTIRLETLFNATQTVPENETEAKFWQNILLRKSSQVPFPVAYETNEDMTWLKNQFGRICVKFNGLSEHTFQIYCDSRQLHWFQRFLEDQQIKKDSKNQHSSALFTLRSGRISWQEEEDKGEPWDVNHLTLYCSVYTRLWTEEGTNLVKEEKAEEIAKTI…		WP_053540472.1	MQEKFFTSKEAAQITGCTLRQIQYWREKGIVVPVIGDTGTGRSIYYSRSNLVELAALVYWLSTGISFDIACETLKQLKEQEPELFISGQGKRFMLLLSQDDSLSLVEFDRKRAIASLDEGKAVIPVWLDVIYQGLASKLPR		Anabaena sp. WA102	924658474	4707906	4698900
WP_008276596.1	MSQITIQCRLVAKEATRQTLWQLMAELNTPFINELLQQVAQYPDFEQWRQRGRLTAKVIEQLGNELKKDPRFLGQPARFYTSGISLVEYIFKSWLKLQQRLQRKLDGKRRWLEVLKSDEQLIKDSQTDLETIRQKATEILQSYEGTERLFNSLFQAYRDEQNILTQTALNYLLKNRCQLPKKPEDAKKFAKRRRKVEITIKRLQKQINGRLPQGRDLTNDNWLETLNLACDTDPKDVEQSRTWQDKLLKKSQSIPFPINYETNEDLTWSKNEKGRFCVQFNGISDLKFEIYCDQRQLKWIQRFYEDQQVKKDGKDQHSSGLFTLRSGRILWQEGKGKGELWDIHRLTLQCTLETRCWTHEGTEQVKQEKADEIAGILTRMNEKGDLTKNQKAFVRRKQS…		WP_008276597.1	MGETFFTSKDAAKITGCTLRQLQYWREKGVIVPIVSATGTGRSVYYSRSELVELAVMVYLLSVGLTFESASGVLQQLREIEPNFAKENSQRRLMLVFDSSEGILKLKDFERESAIAFLDQGLPVIPVWLDGIYQKLDNS		Crocosphaera chwakensis CCY0110	126659126	12217	23546
ACB53128.1 and ACB53129.1 [#]	2 Proteins: MSQITIQCRLVAKEPIRHTLWRLMTDLNTPFINELLQKVAQHPDFEKWKQ; MLKRLQEQINSRLPQGRDVTNENWLETLKIACCTDPENIEEARSWQDNLLTKSSSIPFPINYETNEDLTWSKNEKGRLCVQFNGISDLKFEIYCGNRQLKWFQRFYEDQQIKKSSKNQHSSALFTLRSGRILWQEETGKSQPWNVHRLTLQCTLDTRLWTQERTEEVKQEKAEEIAKVLTSMNEKGDLTKNQQAFIKRKQSTLDRLENPFPRPSQPLYQGKSNILVGVSMELKKPATIAVIDGMTRKVLTYRNIKQLLGKNYPLLNRQRRQKQLQSHQRNVAQQKEAFNQFGDSELGQHIDRLLAKAIISIAQEYQAGSIVVPKLKDIREAIQSE…		ACB53130.1	MGEIFFTSKDAAKITGCTLRQLQYWREKGVIVPMVSATGTGRSVYYSRSELVELAVMVNLLSVGLTFESASGVLQQLREIEPNFAEEKSQRRLMLVFDTSEGMLRLKDFERESAIAFLDQGFPVIPVWVDEIYQKLDAQLLN		Crocosphaera subtropica ATCC 51142	171696371	3921344	3934593
QFS48942.1	MSVITIQCRLVAEEGTLRQLWEWLKNDKGRLFVRFNGLGKLTFEIYCDKRHLQYFQRFLEDQEIKRNSKNQHSSSLFTLRSGRLAWLPGEEKGEVWKVNQLNLYCSLDTRMWTTEGTQQVVEEKVTRITNTLTKVKQKDDLKDEQQAFITRQQSTLDRINNPFPRPSKPNYQGQPSILVGVSFGLKKPVTVAVVDVVKNEVLAYRSVKQLLGENYNLLNRQRQQQQRLSHERHKAQKQNAPNSFGESELGQYIDRLLADAIIAIAKTYQADSIVIPKLRDMREQISSEVQSRAEKKCPGYKEAQQKYAKEYRMSIHRWSYGRLIDSIKSQAVKVGISTEIGTQPIKGSPQEKAGNLAVFAYQERQAT		QFS48943.1	MAEETREVRGRLPKDLKIAFEIACARLELTQTAALEEAIKEWLKKHESTSGDK		Nostoc sphaeroides CCNUC1_(1)	1770420796	5925732	5948831
BAY20677.1	MSVITIQCRLIAHVATLRYLWKLMAEKNTPLINELLEQVAEHPNFEAWLKKGEVSKTAIKTICNSLKTQERFNNQPGRFYTSAVTLVHEVYKSWFALQQRRQRQINGKERWLNMLKSDIELQQESQCDLNVIRAKATEILNKFNAKFSQKKKYKSKKKANNTKNKNKEFLNNTLFSALFDMYDKTEDCLSKCALAYLLKNNCEVNELDEDQEKYAKNKRQKEIEIERLKKQIISRKPKGRDITAEKWLSTLEKATNQVSQNEDEAKSWQASLLRRDSCMPYPIDYDSDDLEWRVNSLAEKNNILEQSKYDVDNEAYKDVNWSDIKNKEGYILVKFNGLKEIIKHPEFYVGCDSRQLDYFQRFCQDWKIWNENQETYSSGLFLLRSARLLWQERKGKGDP…		BAY20678.1	MSEETREVRGRLPKDLKIAFEIACARLELTQTAALEEAVRDWLRKKESSEKQRQQE		Calothrix sp. NIES-2100_(1)	1210101130	538981	567965
BAT55382.1	MSVITIQCRLVAEEDTLRQVWELMTDKNTPLVNELLAQVGKHPEFETWLEKGKIPTEFLKTLVNSLKNQERFSDQPGRFYTSAIALVDYVYKSWFALQKRRKRQIEGKERWLIILKSDLQLEQESQCSLNVIRTEANEILAKFTPQSDQNKNQRKSKRTRKSAKLQTPSLFQNLLNTYEQTQETLTRCAIAYLLKNNCQISERDEDPEEFNRNRRKKEIEIERLKDQLQSRIPKGRDLTGEEWLKTLEIATTNVPQNENEAKAWQAALLRKPADVPFPVAYESNEDMTWLQNDKGRLFVRFNGLGKLTFEIYCDKRHLHYFKRFLEDQELKRNSKNQHSSSLFTLRSGRIAWSLGEEKGEPWKVNKLHLYCTLDTRMWTIEGTQQVVSEKTTKITETLN…		BAT55383.1	MAEETREVRGRLPKDLKIAFEIACARLEVTQTAALEEAIRDWLKKIESSEQQN		Nostoc sp. NIES-3756	953508392	5091349	5113667
OUC12050.1	MSQITIQCRLVAPPTARQHLWTLAAEKNTPLINTLIQEVANHEEFETWRLKGKHPTKIVSEICRRLRTEAPFSGQPARFYTSAEKTVNYIFKSWFTLQSRLQRQLSRKQIWLSILKSDPELVELCGHPLETIQNKATQLLTQIEKTLADSNPEDPQSPCTNDLIRAQLFKKYHGAKTPLIRCSIAYLIKNGGKLPKSPEIPHKFAQRRRKAEIQVQRLQDQLEGRLPKGRDLTGQAWLSTLITATSTVPKDNHEQKQWNDRLLAKPCTTPFPILFETNEDLNWSKNHTGRICVRFNGLSEHTFQVYCDQRQLPWFQRFLEDQQTKHTSKNQHSSALFTLRSAHLAWQETHSNGAGWDNHYITLYCTVDVRLWTAEGTEEVHQEKAVDIAKQLTYLDQKE…		NA	NA		Alkalinema sp. CACIAM 70d	1194458369	NA	25653
WP_017296743.1	MAQITIQCSLVASEATRQYLWHLMADIYTPFINEMLVRIGQHPNFEEWNQKGKIPADVFEDLRKALKEDPAFRGIPGRWYHAGRDLVKRIYKSWLTKRRRLYSQLAGQTHWLTILQSDDELIAACNQDLGVIRAEAAALLVKAEGAAPPSPSAKKSKKSPCPQKKAQKEKSAQPSKSLYPWLFEAYKTAETDLSKCAIAYLLKHNCQIPTKAEDAKKFQKRRRKAEIRVERIIEQLARTRLPKGRDLTDEKWLDTLKMAVQQVPKDEAEAAAWQADLLTDSSPLPFPIAYETNEDLKWSQNAKGRLCVSFNGLAEHSFEIHCDIRQLHWFQRFLDDQTIKKQGRKSHSAGALTLRSGRISWRLDAGKGNPWDRNRLVLFCSVDTLLWTKEGTEKASQEK…		NA	NA		Nodosilinea nodulosa PCC 7104	482909171	323977	NA
WP_015184614.1	MSQITIQCRLVANVSTRHQIWTLMAERNTPLINELLEQIGQHPDFETWRQKRKIPAGIIKQLCEPLRTDSRFIGQPGRFYASASALVDYIYKSWLKVQQRLQRKLEGQMRWLGMLKSDEELVNQSGCTLEVIRTKASEILVPLTSKNESPQPTQTKGKKSKKPQDLGSNRSISKTLFQVYDDIEDLLTKNAICYLLKNGCKIPDQEEDKEKFAKRRRKTEIKISRLEEQLASRIPKGRNLTGEKWLETLIAATSTVPENESQARSWQDRLLTKPQSVPFPVTYESNEDLTWSKNSKGRLCVKFNGLSEHTFQIYCDQRQLKWFQRFLEDQQIKRESKDQHSSSLFTLRSGQIAWALGKGKGDAWNIHHLTLYCTLDTRLWTAEGTEQVRQEKADDIAKT…		WP_015184615.1	MQETFFTSKQAAKITGCTLRQLQYWREKGVVVPVISGTGTGRSLYYSRSDLVELAVMEYWLSVGLSFDLARQSLKMLKDKEPEFFNPEKARRWMLAWNSKMRSLKLLEFDLEDAIASLKSGQPVIPLWLDAIHEELTKRLVG		Allocoleopsis franciscana PCC 7113_(1)	428308377	5617805	5636064
WP_072619878.1	MSQITIQCRLVASEATRQVLWTLMAERNTPLINELLAQMAQHPDLEEWRQKGKPTPGVVKKLCDPLRQDPRFMGQPGRFYSSAIALVEYIYKSWLKLQQRLQRKLEGQQRWLGMLKSDPELCEENHCTLDTLRDKAAEILASLESPQPKQGKVKTKKAKAQSSPRQSLFEMHDGAEDGFVKSAIAYLLKNGGKLPTHEEDPKKFAKRRRKAEVKVERLIHQITASLPKGRDLTGERWLETLLTASYTAPKDAQQTKVWQSILLTKTKAVPYPINYETNEDLTWSKNEKGRLCVRFNGLSEHTFQIYCDQRQLKWFQRFYEDQEVKRTSKNQHSTSLFTLRSGRIVWQESDRNDKPWTANHITLCCTLDTRLWSAEGTEEVRTEKAIDIAKTLTNMNEKG…		WP_072619877.1	MEQPFFSSREAADITGCTLRQLQYWREKEVVIPTINATGTGRSIYYSQANLVELSVMAYWLSLGLTFEVAHESLMKLRAIEPRFVEPPIARRFMLKWEEMRGKLELVEFDREGAIASLDAGQPVIPVWLEQIYSKLSNKISPN		Spirulina major PCC 6313	1119705201	968324	951238
WP_146294649.1	MSQITIQCRLVASEDTRHQLWQLMAQQNTPLINELLKQVAEHPEFETWRQKGKLPGGIVSQLCKPLKEDSRFIGQPARFYTSATKLVEYIYQSWLALQQRLQWRLNGQKRWLEILKSDQELCTQAECSLKTLRHQASEILASLQPSTSKSKKKSKKQKNSYGKSLFDAHDNAEDSLTRSAIAYLLKNNCKLPKEEEDPEKFAQRRRKAEIKVERLTKQIESSLPKGRDLTGEQWLETLLTAANTVPKDKEQFKSWQNILLTKPKSVPFPISYETNEDLTWSKNEKGRLCVRFSGLSKQTFQIYCDQRQLKWFQRFYEDQETKRASKKHHSSSLFTLRSARILWQEGTAKGQPWQINYLTLQCTVDTRLWTAEGTEQVKQEKSDEITKILTNMEEKDNLT…		WP_146294650.1	MNKQFFTSREAAQITGCSLRQLQYWREKEVVVPTIAGTGTGRSVYYSYSELVELKLMESWLAIGFSFDRSRMLLDKLRFYKDKFDYLNPETTDRVMFYWNPDWERLLLDPFERDRAIECLDQGLAVIPLWFDQIHHQLRLKLKYS		Euhalothece natronophila Z-M001	1721887002	707587	963492
BAZ36934.1	MSQITIMCRLVANESTRQQLWQLMAELNTPLINELLVLISQHQDFETWQQKGKIPAGTVKQLCESLKTDPGFAGQPARFYASAIATVSYVYKAWMKVQKRLKSQLESKARWLSMLQSDEELIAIAGVDLDGLRNQARLILQQFAPEPSPQEDLQANKKQPKTEKSLSQTLLDTYESSEDILTRCAISYLLKNGCKVYEKPENSQKFSKHKDKLKVQIQRLIQKLEGRVPQGRNLTDTEWLETLILATEKIPQDEAEAKSWQDSLLKKSSSVIFPVSYESNEDMTWFRNQKGRICIKFNGISEHTFEIYCDSRQLHWFERFLSDQETKKNSKNQHSSALFTLRSARIGWHEQEIKNKQICRRKPTVNPWDIYHLTLYCTVDTRLWTAEGTAVVAAEKAEE…		BAZ36935.1	MQNAFFTSKQAAEITGCTLRQLQYWREKGVIVPTISDTGTGRSVYYSHSEVMELAVMEYCLEVGLNFEVAAATVKRLKEEKRLVVGRDEKAPQRFMLWWDRKMGKLELVEFDIKKAIALLEQGQSITPLWLDAIDSRIRYRTPT		Calothrix sp. NIES-4101	1210217881	23671	46071
WP_019497312.1	MSIITIQCRLVANDRTLQHLWELMAEKNTPLISELLEQLGKHPDFETWLKNGKVPKDTIKILCDSLKTQSRFAGQPGRFYTSAISQVKEIYKSWLTLQKRRQRQIEGKQRWLGMLKSDVELQEESNCSLEKIRAKGTEILAEFVSKFTKDTTKKSKTKIKSTKKSNKKTKKDTEESNSTLFQALCDIYDKTEDTLSKCAIIYLLKNNCQVIDTEENPDTFLKRKRAKEIEIKRLQDQIVGRIPKGRDLTDKKWLDTIKLASSQVPQDENEAKSWQNQLLKTSSSVPYSVDYETNTDIKWVKHNNGSIFVNFNGLGEHQFEVYCDSRQLPYFQRFCEDMQIWHNDEEKYSSALFMLRSARLVWLEKKGRGKPWNVNYLYLHCSLDTSLWTAEGTEQIRIN…		WP_019497311.1 [§]	MQKLSPDKDFGAGMAEETREVRGRIPKDLKIAFEIACARLEVTQTAAIEEAIKDWLKKKESELAPND	MAEETREVRGRIPKDLKIAFEIACARLEVTQTAAIEEAIKDWLKKKESELAPND	Calothrix sp. PCC 7103	485067392	722827	700370
WP_152590046.1	MSVITIQCRLVASEDTRRYLWQLMAEKNTPLINELLEQVRMHPDMEEWLKKGKLPNGVIKPLCDSLSTQERFVNQPKRFYKSAIEVVEYIYKSWLALQKERQQKIDKKEHWLNMLKSDVELEQESNFSLKIIRAKAIKILPQYIAKVEEIHKQNITNKNVNKRKKSKNNNYTLFDILFKAYDQAKIPLNRCAIAYVLKNNCQVSEEEEDPNRYALRRSKKLKEIERLKEQLKSRIPSGRDLTGQEWLQSLLVATTNVPESENQFKIWQKHLLQNPSSIPFPVQFTSNEDLIWSKNEKGRICVSFSGKEFNNPSFEIYCDNKQIHWFQRFLEDQSIKRNNKDQHSSSLFTLRSGRIAWQHNEGNDLPWNIHRLTLYCSVDTRLWTIEGTQEFRQEKVDEI…		WP_152590045.1	MRENNINIEYRFGKAIRRRRRELDYSQEELAEKAGLHRNYISSIETGTRNPSLKNIEKLAKALNISISALFINYSIEAEHKSEKDTEC		Nostoc sphaeroides CCNUC1_(2)	1770774098	5037248	5011100
PZV06487.1	MSLITLQCRLVANEDTRRLLWLLMAKKYTPLINELLQKIAKHDSFDNWCQTGTISLVVVKEFCKELRQEARFTGQPGRFYTSAITLVHRIYKSWLALQVRLKRKIAGQTRWLAILQSDDELAVAIQSDLSTLQTKAREILAQIRPSTPADDEPQPKKARIRKQSTPKNKQQGASIFSVLFGLYEQTQNDVLTRCAIVYLLKNGCRVPDKPEDHKRFAKRRRKAEIRLERLMTQFQNSRLPSGRDLSDQTWLEALALATTQMPEDEKQAADWQASLLTKAKPLPFPVNYETNEDLHWFLNHKGRLCVRFNGISEHTFEIYCNTRQLHWFKRFLEDQEIKKTSKGQHSSGLFALRSGRIAWRAGFGKGDPWNQHHLELSCAVDTRLWTAAGTAQVCQEKAT…		NA	NA		Leptolyngbya sp. ULC077bin1	1405652045	4773	NA
WP_094343940.1	MSVITIQCRLVASEDTRRHLWQLMAEKNTPLINELLKQVRIHPDMEQWLKKGKLPDGVIKPLCDSLSTQECFVNQPKRFYKSAIEVVEYIYKSWLALQKERQQKIDKKEHWLNMLKSDIELEQESNFSLNIIRAKAIKVLAHYIAKVEENHKQDITNKNVNKRKKSKSKNNNYTLFDILFKAYDQAKVSLNRCAIAYLLKNNCQVSEEEEDPNRYALRRSKKLKEIERLKEQLKSRIPSGRDLTGQEWLQSLLVATTNVPESENQFKIWQKHLLQNSSSIPFPVQFTSNEDLIWSKNEKGRICVSFSGEEFNNHIFEIYCDKKQIYWFQRFLEDQSIKRNNKKQYSSSLFTLRSGRLAWQDNKGNDLPWKIHRLTLYCSVDTRLWTIEGTQEFRREKVD…		WP_094343939.1	MREKNISIEYRFGKAIRRRRRELDYSQEELAEKAGLHRNYISSIETGTRNPSLKNIEKLAKALNISISALFTNYSIEAEHKSEKDTEC		Nostoc sp. 'Peltigera membranacea cyanobiont' 232_(2)	1231447032	18664	NA
WP_106368686.1	MSVITIQCRLVAEEDFLRQLWELMAEKNTPLINELLAQLGKHPELETWLEKGKIPTELLKALGNALKTQEPFAGQPGRFYTSAIALVNYVYKSWFALQKRRKYQIEGKERWLKMLKSDLDLEQESQCSLDVIRIKATELLTKFTPQFDTNNKQRKGKKNKKASKTQKPSVFKVLLNTYEETQCLLTRCALAYLLKNNCQISELNENLEEFTRNRRKKEIEIERLKDQLQSRIPKGRDLKGEEWLKILKIATANVAQDENEAKAWQAALLRKTKNVPFPVDYESNEDMTWLKNDKNRLFVRFNGLGKLTFEIYCDKRHLPYFQRFLEDQEIKRNSKNQYSSSLFTLRSARISWLPGKEKGEAWKVNQLNLYCSLDTRMWTTEGTIQVVEEKVMAITETLT…		WP_199192150.1	MAEETREVRGRVPKDLKIAFEIACARLEVTQTAALEEAIRDWLQKKDSPAGGKLQRS		Chlorogloea sp. CCALA 695_(2)	1361175098	46345	28073
WP_099436544.1	MVQVTIQSRLIASADTRQSLWLLMSKKNTPLINEILTRIKHHPDFPQWREKGRLPKNFIAQQIQELKNDSRFQGQPSRFYASVGKIIDYIYKSWFKVQKSYKIQLEGNSRWLEMLKPDSLLIESFDGSMEALQNQAQQILDNIETTSTQEGIVDYLFQKYEKIENCRMKDAIVYLIKNGSRIPKNNIETTKKYKRIKRKLEIKIRKLKRQVEMSIPSGRDLEGEKWLHTLILASNTMPVDQSESDSWFSALKRNSPSIPYPIVYESNEDLTWCLNNQNRICIKFSGLSDHLFQIYCDSRQLAYFRRFYEDQELKKASKDQFSSALFTLRSAMIIWKEDDGKGESWDKHKLYLHCTFDTDYWTVEGTQVIAQKKQEEVLNLIDRMKEKTDLTDTQKAFIQ…		WP_099436545.1	MKQELFFSSKDISLITGCSLRQLQYWRDKEIIVPLIMATGTGKTIYYSFVELVEVSVMVYMLSVGLNLEMVQKILNDLREKEPSFINKDFKKRFMVIANDGTVELLPYQRERAIALLEEGKAIVPLWIDQIHQQLTEKVG		Cyanobacterium aponinum IPPAS B-1201_(2)	1273038254	5678	20843
AUC60501.1 [§]	MLLYKYVLLNIIVDAMSLITIQCRLVASADTRQFLWMLMSQKNTPLINEIFMRIAEHPDFSVWKEKGKLPKNFLAQQIAELKEDKRFQGQPSRFYASVHKMIDYVYESWFTIQDKNKFRLQGHTRWLEMLKPDTEILQCFDGSWEKLQNQAKKILDEIDSTLSHTRIVDKLFKEYEATNDPRIQGAIVYLIKNGASIPDNKVETEKKYKKLKRKVEIQVHKLKKQIEISAPTGRDLNQQKWLDTLILASLASTTMPLNQAQCDRWFSALKKNSPSIPYPVIYETNEDLKWSLSDQNRLHVRFNGLSDHTFKIYCDSRQLPYFQRFYEDQELKKANKNQFSSALFTLRSAMIIWKEDDGKGELWDKHKLYLHCTLDTDYWTVEGTQVVAQRKQKEVLNII…	MSLITIQCRLVASADTRQFLWMLMSQKNTPLINEIFMRIAEHPDFSVWKEKGKLPKNFLAQQIAELKEDKRFQGQPSRFYASVHKMIDYVYESWFTIQDKNKFRLQGHTRWLEMLKPDTEILQCFDGSWEKLQNQAKKILDEIDSTLSHTRIVDKLFKEYEATNDPRIQGAIVYLIKNGASIPDNKVETEKKYKKLKRKVEIQVHKLKKQIEISAPTGRDLNQQKWLDTLILASLASTTMPLNQAQCDRWFSALKKNSPSIPYPVIYETNEDLKWSLSDQNRLHVRFNGLSDHTFKIYCDSRQLPYFQRFYEDQELKKANKNQFSSALFTLRSAMIIWKEDDGKGELWDKHKLYLHCTLDTDYWTVEGTQVVAQRKQKEVLNIIDGMKEKDDLRDTQKK…	AUC60500.1	MKQEVFFSSKDISKITGCSLRQLQYWRDKEVVVPFIGASGTGKTIYYSSVELVEVSVMVYLLSVGLNLEMVQKILNDLRAKEPDFTDSGCKKRFMVVAGDGTVDLLPYEQEGAIALLERGRGIIPLWIQTIHQNIQEYSLY		Cyanobacterium sp. HL-69_(1)	1298149266	1001316	990918
BAQ64620.1 [§]	MLVKNCLSIIIIVQLEDNIFSINFIKTLTIRKTICYFKVMTIKTICCQLIAPEQTRQRLWQYMAEQYTPLMTELIRQVGEHPDLSQWQDKGKMPSNIVKDLCATLKQIRPFTGLPSNFYQSAINQVNYIFASWLASQHKLKLRLNGKRYYFSMLYSDQDLVKNSGHTLTEIRSQAQIILNQISNKKTEEKHKYLFQHHRESSNILGKTAITYLIKHNQKIPTEPEHRDKFEKLYRKTQIQIEKLEKQIEARLPKGRNLSEQQWLNTLITASQNVPKDENEAKLWQKYILTDSNSLPYPVSYETNENLVWSLDEQGRLNLRFNGLGKLTFKVYCDNRQLHYFQQFLQDQTIKKSGKNKHSSGLFLLRSAMLVWKPNESKGKSWNKNTLHLHCAIDTRLLT…	MTIKTICCQLIAPEQTRQRLWQYMAEQYTPLMTELIRQVGEHPDLSQWQDKGKMPSNIVKDLCATLKQIRPFTGLPSNFYQSAINQVNYIFASWLASQHKLKLRLNGKRYYFSMLYSDQDLVKNSGHTLTEIRSQAQIILNQISNKKTEEKHKYLFQHHRESSNILGKTAITYLIKHNQKIPTEPEHRDKFEKLYRKTQIQIEKLEKQIEARLPKGRNLSEQQWLNTLITASQNVPKDENEAKLWQKYILTDSNSLPYPVSYETNENLVWSLDEQGRLNLRFNGLGKLTFKVYCDNRQLHYFQQFLQDQTIKKSGKNKHSSGLFLLRSAMLVWKPNESKGKSWNKNTLHLHCAIDTRLLTLEGTQEVREEKLTQVTNIIQSMEKKPSLNDNQKQCLKRK…	BAQ64619.1	MDKQFFTSKEAATIAGLTYRQVEYWRKKDIIVPTVNTEGSGHNVYYSLCELWQLALMGYLLDMGLDFQICCQILNEFKERHEEFMKDPLDFSPLKYTLCPDPEKGFTLKHLSPIEITQALSRGESVLLLWTENVNQRLIEGLSLVLTPKKKPLLTRK		Geminocystis sp. NIES-3709_(1)	770470343	1556568	1525567
WP_088893327.1	MSIITIHCRLTAPESVRRHLWLLMSGRNTPLINDLLKRVSQHPDFETWQYWGTVPKVAIKELCEPLKELYPGQPARFYASAILMVTYIYESWLSLQQTRRHRLNGKQRWLEVVKSDAELLEMSSSTLETIRHRAQEILSRCNVESTPQSESSTKKRSKQQGQSSASSSKSLMTRLFETYNSADDILSRCAIAHLMKNDCKVSATEEDPKEFAHRILRKQKDIEQLEAQLQARLPKGRDLTGEEFLKTLTIATQQISASVAEARDWQGKLLTRPKSLPYPIIYGSSTDVRWGKTAKGRITVSFNGIDKYLKEADSEIQEWFKTQKEYPFRLYCDQRQLPFFQRFLEDWQAYQANKDTYPAGLLTLSSATLGWREGEGKGEPWQVNHLVLYCSFDTRLMTA…		WP_088893326.1	MTLAPRPPTPRHWNALKAYLQPLGDDQMELDEFLRNWDVSREELAFICDCSLTTVNHWFSQGEHRRIPTDKHKQRLALTHHIWVTIESEPEYLQRLRQMYHKKSRRKP		Leptolyngbya ohadii IS1_(1)	1214783892	2785890	2767732
WP_069791082.1	MSLITIQCRLVASADTRQFLWMLMSQKNTPLINEIFMRIAEHPDFSVWKEKGKLPKNFLAQQIAELKEDKRFQGQPCRFYASVHKMIEYVYESWFTIQDKNKFRLQGHTRWLEMLKPDTEILQCFDGSLEKLQNQARKILDEIDSTLPHKRIIDQLFKEYERINDPRIQGAIVYLIKNGASIPDNKVETEKKYKKLKRKVEIQVNKLKEQIEISVPTGRELNDQKWLDTLILASTTMPLNQAQCDHWFSVLQQNSPCVPYPIIYQTNEDLRWSINDKNRLCVQFSGLGGHLFTIYCDSRQLSYFRRFYEDQGLKKSHKDKFSSALFTLRSILLLWKEDKTNKTKGEPWQINRLYLHCTLETDCWTVEGTQVVAQRKQKEVLNIIDGMKEKDDLRDTQKK…		WP_069791081.1	MKQEVFFSSKDISRITGCSLRQLQYWRDKEVVMPLIGASGTGKTIYYSFVGLVEVSVMVYLLSVGLNLEMVQKILADLRTREPDFTNIGFKKRFMVVASDGTVNLLPYEREGAIALLEKGRGIIPLWIDQIHEILEIKINHC		Cyanobacterium sp. IPPAS B-1200	1071034116	5093	NA
WP_015183357.1	MSIITVQCQLKATKDSLRHLWSLMVEKNTLLVNELLKQINTHPDLENWLKVGNIKAEVIEGLCDNLRTESRFQDMPGRFANAAEKLVKDIYKSWFALQEERRFRLWRKQRWFSLLRSDLELEQESGLSLEKLRTEATKILIKAQLECSREAEPDQATTDNSSALWDNLFTAYDKFKSPRLRCVIAYLLKNGCQVNKVEEDPEAYQRRRRKKEIQIERLKEQLKSRLPKGRNLSEQEWLEALEQAQGLIIDDEHLRQVQASLTRKQSPVPFSISYETSTDLRWSSNEQGRICVSFNGKGISKHTFEVFCDQRQLHWFERFYEDYKIFTQNKDQVPAGLLTLRSARLVWQEGEGEGEPWQVHRLLLHCSVETRLWTAQGTEEVRAEKIAQTQAAIDRQKAK…		NA	NA		Allocoleopsis franciscana PCC 7113_(2)	428308377	4024305	4004516
WP_027843568.1	MTQITVQCRLVATETTRQELWDLMADKNTPLINELLKQVAEHSDFEAWRQKGKIPTGTIKQLCEPLKTDSRFIGQPGRFYTSAIALVSYIYKSWLALMKRLQYKLEGKIHWLEMLKSDEELVEISGVNLEALRSKAAEILAQFSPQIDTNNSQNKRKTKSKNSKKSKSSDISKNLSQQLFDTYRDTEDIVTHCAISYLLKNGSKLPNKEESPEKFTQRRRKIEIQIQRLREQLEARIPHGRDLTDLNWLNTLDIATNQVPQSETEAKSWQNNLLRKSHAVPFPVSYETNEDMTWFKNRKGRICVKFNGLSEHTFEIYCDNRQLHWFKRFLSDQQIKKNSKNQHSSSLFTLRSGRISWQEEVGKDRPWNVNHLKLDCTVDTRLWTAEGTNQVREEKAEEI…		WP_027843567.1	MEDTFFTSKQAAQITGCTLRQLQYWREKNVVVPVISETGTGRSIYYSISNLVELSAMSYWLGAGLNFDIASDTLRALKEKEPELFKSGKGSRWMLHWNVQKEKLCFEKFDREKAIASLDKGQIVIPVWLDLVYQGLKQKLGN		Mastigocoleus testarum BC008	959925997	31640	49913
no_NCBI_ID	MTQKNTPLILQLLKSVSEQPEFEANKEKGEITKKEIVELRKGLKKNPEFEEQSGRLRSSAESFVKEVYSSWLTLYQKRKRQKEGKEYFLENILKSDVELVGESNCDLETIRSKAQEVLTQPEEFIKQLTINDEDVKPTKSARKRVNKNIYNKSTDAEQREDSSSPNNVDENKLETLTNVLYKIHKQTQDILTRCAVAYLIKNHNKISELEEDVQKLKKRRNEKKVEIKRLENQIQDNRLPSGRDKLLRI		NA	NA		Nostoc sp. 'Peltigera membranacea cyanobiont' 232_(3)	1231446996	54685	NA
WP_096384998.1	MRQKPEDPKKFAKRRRKTEIKVERLLKKLNSQTPKGRDLTGQQWLDTLITVATHVPQDEVQAKLWQDILLTKPKSVPFPITYETNEDMTWSKNEKSRLCVRFSGLGEHIFEIYCDQRQLPLFQRFYQDQEVKKASKNLHSSALFLLRSSRIAWQEGEGKGEPWNVNHLTLYCTLGTRLLTAEGTEQVRQEKAAEIATTLTRMKEKGDLNAKQQAFVKRKQTCLSRINNPFPRPDRPLYQGQAHILLGIYMGLEKPATAAVIDAISGKVITYRSTKQLLGDNYQLLNRQRRQKSFLSHQRHLNQKHHANNQLGESKLGQHLDRLLANAIVNLAKTYQVGSIVLPKLGNMREIVQSEIQALAEQKIPGNKEGQKKYAKQYRVNVHQWSYGRLMENIKAQAA…		NA	NA		Stanieria sp. NIES-3757	1246803856	4969648	NA
CDN11863.1 [§,#]	MTCCSIVYLLKNNCQVSLLEEEPDEYAKLRRKKEIEIERLKEQLKSHIPKGRDLTGLEWSDILEKIANSTPQTENEAKLWQASLLRKSRSVPFPVAYETSEDMYWEINEQGRVFVRFNGLSKLKFEVYCDQRHVHWFRGFVEDWETKHKGKNQHSSSLFTLRSGRLVWLEQKAKGEPWNVNRLILHCSLDTRMWSHEGTQQVINEKIVKIENTLTKVKDKGELNPKQQAFVTRQKSTLARINTPFPRPSRTLYQGKSHILVGVSLGLEKFATVAVLDAIQNKVLAYCSVKQLLGNNYKLLNRQRYQKQRLSQEPHKTQKQFTPKNFGESELGQYIDRLIAQKIVANAKTYHAGSIVLPKLGYMGEIIQSEVQAKAEKKIPGYLEGQQRYAKEYRKQVHN…		NA	NA		Richelia intracellularis RC01	605045291	29990	NA
WP_163929718.1	MSLITIQCRLVSEENSLRIFWELMTEKNAPLINELLEQLSKHPNFETWLQKGEVPKNTIETICDSLKIQDRFADQPGRFYTSAVTLVKEVYKSWFALQQRRQRQIKGKERWLNMLKSDIELQQESQCDLDIIRAKATEILTSFVANFTDDKNQKSKIKKGNKTKKNKKDSSNTTLFNGLFDIYEKTEDCLSRCALAYLLKNKCQVSEVDEDPDEYAKGRRKKEIEIERLRNQIKSRKPKGRDLTGEKWLEILSEVVNKVPLNEDEAKSWQATLLRGNSYMPYPVDYETNTDLTWLINDKGRIFVKFNGLNKLMNEPKFEVYCDSRQLHYFQRFCQDWQIWHEDKETYSSGLFILRSARLLWQERKGKGKPWKIHRLILQCSVETRLWTQEETELVRFEK…		WP_163929717.1	MLLLKGCATINPEPRHDVEMAEETREVRGRIPKELKIAFEIACARLEFTQTAALEEAIRDWLKKKESAADEK		Nostoc sp. UIC 10630	1817037224	6420	NA
WP_039730330.1	MSKITIQCRLVASEATRQYLWHLMADIYTPFVNEILRQIREDDNFEQWRQSGKIPASVFEDYRKTLKTESRFQGMPGRWYYAGREEVKRIYKSWLALRRRLRNQLAGQNRWLEVLQSDETLMEVSGLDLSALQAEASQLLNILGSKNKTSKNRSKKAKGKPKGKSAKDPTLYQALWELYRETEDIAKKCVIAYLLKHKCQVPDKPEDPKKFRHRRREAEIRAERLNEQLIKTRLPKGRDLTNEQWLQVLEIATRQVPKDEDEAAIWQSRLLTDAAKFPFPVAYETNEDLKWFLNGKGRLCVSFNGLSEHTFEVYCGQRQLYWFNRFLEDQQIKKENQGERSAGLFTLRSGRLVWKPYSSDASRSDPWMANQLTLQCSVDTRLWTAEGTEQVRQEKATSI…		NA	NA		Lyngbya confervoides BDU141951	1816760610	4488652	NA
WP_073608258.1	MSIITIQCRLTASVATRQHLWNLMAHSNTPLVSELMRIIPLQPDFENWRQASKIPAKAIRDLCASFRKDERFAGQPGRFYSSASTMVAYTYDAWFALQASRLRRLYGMRRWLEILQSDTEMLKLCGVSWESFQERARAILQTATDQIQAKQPTPQPARRGNKKQRKQSDKIVSRRRLVDRLFQLYNESPETLDRCAIVRLLKNGCTVPEQAEQPERYQRMLLAKQTGVSRIERELASRLPKGRDLTDENFLNALELLTYQIPTSTEEFAQWKSQLLREPNPLPYPVLYSGNLNLTWFVEEVPRGKSQKPKQQICVKLNGLAKHVLKVQCDARQHHYFQRFVQDWDIYNRGKGPISGSLLLLRTASILWKPVQQSRHRATGEPWSDHSLYLHCQIDTKLL…		NA	NA		Phormidium tenue NIES-30	1121299508	38247	NA
BAY38490.1	MSVITIQCRLVAEEDTLRTLWELMANKYTPFINELLVQLGQHPEFETWLKKGEVPKETIERINKSLSTQEPFAGQPGRFYTSAITLVKEIYKSWFTLQQRRLRQIEGKERWLKIFKSDIELQQESQCDLNIIRTKASEILNSCAEQLTQDKNQQSKKKGKNTKKNKNESSASTLMNLLFNLYETSDDCLYRCAIAYLIKNNCQVSYLEEEPEQYIKRRHRKEIEIERLRDKLKSRIPNGRDLTGKDWLSTLNKVNNEIPKDENEFKLWQKNLLKVHNSMPFTVDYRTNTDLDCLLGFLNKETNIQKIILCQMYCLKLALKEGLYSFIKYLFADVNSILDKSNELLELLQHSNNKHLIWQLYLMKLSLKSGLDTFIKYMYAKILNLIYKQCKYLVQFNGL…		BAY38491.1	MAEETREVRGRLPKDLKIAFEIACARLEVTQTAALEEAIRDWLQKKDSSTGGKSQGD		Nostoc sp. NIES-2111	1210116560	3336377	NA
AFY67257.1	MPIITVECLLAASEETRQYVWSLMVQHAVLVRELLERAAQHPDFERWQSAGNLPAKAVERLAKESSNEEPPLLLEPRFSQLPDRFYKSAISTVQTTYKSWLALQHGRQQQRNRKQLWLDIVEDDLLTEYDESQLDSIIKKAHEILSQLLSEMKKEANETSEDKKVRRKKATKKKDKAQTDSEEMQEERKFISIYKLNKLYNSSTDAVTRRAIAHLVRNHSQVNEEEDPDKIPLEIEKTRIEIERLDQQLKSQLPKGRDPFGTQYQKNLEFATELPSKLSTSEEDVSEFIKWNAEEGQRRIAVMRLPKSLPYPISFGSNTDLRWFQETQERKTLKGKKTNKPRNQIIVRFQGLKNHSFKILCDRRQLPHFQQFVTDWKTYQELDRKGKADSEKCSASLFL…		AFY67258.1	MELDEFLKHWDVTREELAYICDCSLTTVNHWFSQGEHRRFPSEKHKQKLALAHHIWTTIETEPEYLQTLREMYIKKHRKR		Geitlerinema sp. PCC 7407	427983362	3405167	3464855
ABA20785.1	MSQITIQCRLVASEPSRHQLWKLMVDLNTPLINELLVQVAQHPEFETWRQKGKHPAKIVKELCEPLRTDPRFIGQPGRFYTSAIATVNYIYKSWFALMKRSQSQLEGKMRWWEMLKSDAELVEVSGVTLESLRTKAAEILSQFAPQPDTVEAQPAKGKKRKKTKKSDGDCAERTLRERSISDYLFEAYRDTEEILTRCAINYLLKNGCKISNKEENAEKFAKRRRKLEIQIERLREKLEARIPKGRDLTDAKWLETLLLATLNVPENEAEAKSWQDSLLKKSITVPFPVAYETNEDMTWFKNERGRICVKFSGLSEHTFQVYCDSRQLQWFQRFLEDQQIKRNSKNQHSSSLFTLRSGRIAWQEGEGKSEPWKVNRLILYCSVDTRLWTAEGTNLVREE…		ABA20784.1	MQETFFTSKEASKITGCTLRQLQYWREKGVVVPVISDTGTGRSIYYSKTNLVELAAMVYWLSVGLSFDIACETLKTLKDQEPELFSSGTGRRFMLLSEAQERSPLGAPKISLELMEFDRTKAIASLDEGKPVIPVWLDEIYQQLQQKLKA		Trichormus variabilis ATCC 29413_(1)	75699950	1424266	1407313
AFZ58287.1	MSQITIQCRLVASETTRQQLWQLMAEKNTPLINELLSQIGKHPEFETWRQKGKHPTGIVKELCEPLKTDPRFIGQPARFYTSATASVNYIYESWFALMKRYQSQLDGKLRWLEMFNSDAELVEHSGVSLDTLRATSAEILAQFAPQDTNRDTSNKGKKSKMGKKSQKSDSEGNLSKKLFDAYSSAEDNLTRCAISHLLKNGCKVSNKEENSEKFTQRRRKLEIQIQRLTEKLAARIPKGRDLTDTQWLETLFTATYNVPEDETEAKLWQNSLLRKFSSLPFPVAYETNEDLVWSKNRFGRICLTFPTLREHIFQIYCDSRQLHWFQRFLEDQEIKKNSKNQHSSALFTLRSGRIAWQEGEGKGEPWDIHHLTLYCCVDTRLWTEEGTNLVKEEKAEEIA…		AFZ58288.1	MQETFFTSKEAAQLTGCTLRQIQYWREKGIVVPIISDTGTGRSIYYSRSNLVELAALVYWLSTGISFDIACETLKRLKAQEPELFISGKGKRFMLLLSAQNESLSLVEFDRKSAIASLDEGKAVIPVWLDIIYQKLASRLAQ		Anabaena cylindrica PCC 7122_(1)	428676849	3250341	3271012
AFZ13451.1	MSQITVQCRLVASESTRHHLWKLMADLNTPLINELLARMAQHQDFETWRKKGKLPDGIVKQLYQPLKTDPRFTNQPGRFYTSAITVVDYIYKSWFKIQQRLEQKLKGQIRWLGMLKSDEELAAESNTSIEVIRTNAAELITSLSSEDGSVSTRLWKTYDETDDILTHCVICYLLKNGSKVPKKPEENLEKFAKRRRKVEIKIERLRRQLESRIPKGRDLTGKNWLETLAIASTTAPADEPEAQSWQDTLLTESKLVPFPVAYETNENLTWSKNEKGRLCVQISGLSKHIFQIYCDQRQLKWFQRFYEDQEIKKANKDQYSSGLFTLRSGRIAWQEGTDKGEPWNIHHLILYCTVDTRLWTAEGTEQVCQEKAEDIAKTLTRMKKKGDLNDRQQAFIRRQ…		AFZ13450.1	MSETFFSSKETAEITGCSLRQLQYWRERGVVVPPISATGTGRSIYYSRSELAELIVMEYWLSVGLSFEVAAKALQALKQKAPDFSDPVVQKRFMLVWDKEKKDLSLEEFEREDAIASLDKGQPVIPMWLDQIHHQLAVKLDESTVK		Crinalium epipsammum PCC 9333_(1)	428245228	2914360	2898576
BAY83128.1	MSFKTIQCRLVAEESTRQQLWQLMAHKNTPLINELLLQVAQHPDFETWRKKGKIAKGIITQLCQSLKTDLRFIGQPGRFYTSAITFVDCIYKSWLELMKLNQRRLEGKNRWQKMLKSDAELVEDSSASLDLIRSKATEILAQAQLNSESLSAENQENNKSEKSIKKQKKGKKKNNKKSEESEENKSLSKALFDAYENTEDILTRCAISYLLKNGCKVTNKEEDPEKFTIRRRKLEIEIEDLQEKLEARLPKARDLTDSSWLNNLELATKQVPESEEEAKSWQDALLKKSSSVPFPIAYETNEDMTWFKNEKGRICVKFNGIGEHTFEIYCNKRQLHWFKRFLLDQETKKNSNDQYSSSLFTLRSGLILWQERDKKGKPWNINYLALHCCVDTRLWTAEG…		BAY83127.1	MEKQFFTSKQAAQMTGCTLRQLQYWREKEVIVPTINGTGTGRSVYYSRSEVMELAVMEYCLKVGLNFEAAAATVKRLKDEGLILTNDEKAPRRFMLCWDGIKGRLTFMEFELKKAIALLEKGKAIIPVWLDEIYQGLSLKV		Calothrix parasitica NIES-267	1210161462	3371380	3344468
ABA20947.1	MSVITIQCRLVAEEDILRQLWELMAEKNTPLINELLAQVGKHPEFETWLDKGRIPTELLKTLVNSFKTQERFADQPGRFYTSAIALVDYVYKSWFALQKRRKRQIEGKERWLTILKSDLQLEQESQCNLNVIRTKANEILTQFTPQSDQNKNPRKSKKAKKSAKLQKSSLFQILLNTHEQTQETLTRCAIAYLLKNNCQISERDEDPEEFNRNRRTKEIEIERLKDQLQSRIPKGRDLTGEEWLETLEIATVNVPQNEKEAKAWQAALLRKTADVPFPVAYESNEDMTWLQNDKDRLFVRFNGLGKMTFEVYCDKRHLHYFKRFLEDQEIKRNSKNQYSSSLFTLRSGRLAWLPGKQKGEPWKINQLHLYCTLDTRMWTAEGTQQVVNEKITKITETLT…		no_NCBI_ID	MAEETREVRGRLPKDLKIAFEIACARLELTQTAALEEAIKEWLKKHESTSSDK		Trichormus variabilis ATCC 29413_(2)	75699950	1622493	1654810
ALF54868.1	MSVITIQCRLVAGEDTLRTLWELMADKNTPLVNELLAQVGKHPEFEPWLEKGKIPTEFLKTLVNSLKTQERFADQPGRFYTSAIALVDYVYKSWFALQKRRKRQIEGKERWLTILKSDLQLEQESQCSLNAIRTKANEILTKLTPQSEQNKNQRKSKKTKKSAKLQKSSLFQILLNTYEQTQETLTHCAIAYLLKNNCQISELEEDSEEFTKNRRKKEIEIERLKDQLQSRIPKGRDLKGEEWLKTLEISTANVPQNENDAKAWQAALLRKSADVPFPVAYESNEDMTWLQNEKGRLFVRFNGLGKLTFEIYCDKRHLHYFTRFLEDQEIKRNSKNQYSSSLFTLRSGRLAWSPGEDRGEPWKVNQLHLYCSLDTRMWTIEGTQQVADEKSTKITETLT…		no_NCBI_ID	MAEETREVRGRLPKDLKIAFEIACARLELTQTAALEEAIKEWLKKHESTSSDK		Nostoc piscinale CENA21	930349143	5130097	5101101
ACK66236.1	MSQITIQCRLVAKEPIRHTLWQLMADLNTPFINELLQKVAQNPDFEQWKQKGKLQKSVIKQLGDKLKKDPRYLGQPARFYTSGISLVEYIFKSWLKLQQRLQRKLDGKRRWLTVLKSDEELIQQSQQNLEAIRHKASEILQTHQKTEKLFNHLFQLYQEEKNPFTHIALCYLLKNRCKLPQKPEDPEKFTKRRRKVEIAIDRLQEQLEGRLPQGRDLTNHNWLETLSIACQTDPEDTAQARSWQDKLLIQSQSIPFPINYETNEDLTWHKNEKGRLCVKFNGISDLSFEIYCDQRQLKWFQRFYEDQQAKKGSKNQHSSALFTLRSGRILWQEGNEKGQPWNIHRLILQCTLDTRLWTQEGTEEVKQEKAEEIAKVLTSMNEKGDLTKNQQAFIKRKQS…		ACK66237.1	MGETFFTSKDAAKITGCTLRQLQYWREKGVIVPMVSATGTGRSVYYSRSELVELAVMVYLLSVGLTFESASGVLQQLRELEPNFAKENSQRRLMLVFDTSEGILKLKDFERESAIAFLDRGEAIIPLWLEQIHQQLNQTLPIN		Rippkaea orientalis PCC 8801_(1)	218165370	2283733	2305325
AFZ00435.1	MSVITIQCRLVADEETLRHLWTLMAEKNTPFANEILEQLAQHAEFESWVKNSRVPATVIKELCDSLKNQELFAGQPGRFYTSATTLVTYIYKSWLAVNKRLQRKIEGKKQWLDMLRSDTELEQESNSNLEKIRAKATEILDSFATRQINQVNSKSKTSKNNKNKQEKEVKSLSIQSNILFETYRQTEDNLTKCAIVYLLKNNCEVNDVEEDIEEYEKNKRKKEIQIKRLEDQLKSRVPKGRDLTGEKWVEVLEKAVNSVPESENEAKSWQASLLRKSSQIPFPVVYETNEDIKWSINEKGRIFVSFNGLGKLKFEIFCDKRHLHYFQRFLEDQDIKRQGKNQHSSSLFTLRSGRISWLEQPGKGKPWNINRLLLFCSIDTRMLTAEGTQQVIEEKIADT…		AFZ00434.1	MLVYYARINPGRAFGAGMTEETREVRGRIPKELKITFEIACARLEVTQTAALEEAIKDWLKKQESTSSDKSV		Calothrix sp. PCC 6303	428233323	1622163	1588178
AFZ56196.1	MSVITIQCRLVAEEDSLRQLWELMSEKNTPFINEILLQIGKHPEFETWLEKGRIPAELLKTLGNSLKTQEPFTGQPGRFYTSAITLVDYLYKSWFALQKRRKQQIEGKQRWLKMLKSDQELEQESQSSLEVIRNKATELFSKFTPQSDSEALRRNQNDKQKKVKKTKKSTKPKTSSIFKIFLSTYEEAEEPLTRCALAYLLKNNCQISELDENPEEFTRNKRRKEIEIERLKDQLQSRIPKGRDLTGEEWLETLEIATFNVPQNENEAKAWQAALLRKTANVPFPVAYESNEDMTWLKNDKNRLFVRFNGLGKLTFEIYCDKRHLHYFQRFLEDQEILRNSKRQHSSSLFTLRSGRIAWLPGEEKGEHWKVNQLNFYCSLDTRMLTTEGTQQVVEEKVT…		NA	NA		Anabaena cylindrica PCC 7122_(2)	428676849	740045	717097
BAS55909.1	MSVITIQCKLVATEETRRALWHLMAEKHTPLINELLKHIAQDSRFEEWSLTGKLPRLVVSEACNQLKQDPQFSGQPGRFYSSAISTVHRIFLSWLALQTRLRNQISGQTRWLAMLQSDNELTIASQTDINTLRLKASELLTHLNEPISESDQPEVKKTRSKKKNQTSNQAGANVSRTLFKLYDETEDPLTRCAIAYLLKNGCKLPDQNENPEKFIKRRRKTEIRLERLMNTFQTTRIPRGRHLSWHSWIEALETATSHIPENEEEAAGWQARLLTKPAILPFPVNYETNEDLRWSLNSQGRICVSFNGLSEHFFEVYCDQRDLHWFNRFLEDQETKKASKNQHSSSLFSLRSGQIAWQEGKGDAEHWVVHRLVLSCSIETDTWTQEGTEEIRQKKASDC…		BAS55908.1	MEIDEFLNNWDVSREELAFICDCSLTTVNHWFSQGEHRRIPTDKHKQRLALAHHIWITIESEPEYLQTLRQMYHKQRRREEKE		Leptolyngbya boryana IAM M-101	757114186	1947498	1924106
ABA21816.1	MSVITIQCRLIASEATRSYLWQLMAQKNTPLINELIEQLGIHPEIEQWLKKGKLPDGVVKPLCDSLITQESFANQPKRFNKSAIEVVEYIYKSWLALQKERQQTIDRKEHWLKMLKSDVELEQESKCTLDAIRSQATKILPKYLAQSEQNNNQTQSQNKKKSKKSKTKNENSTLFDILFKAYDKAKNPLNRCTLAYLLKNNCQVSQKDEDPNQYALRRSKKEKEIERLKKQLQSRKPNGRDLTGREWQQTLIMATSSVPESNDEANIWQKRLLKKDISLPFPIRFRTNEDLIWSKNEEGRICVSFSGEGLNDHIFEIYCGNRQIHWFQRFLEDQNIKNDNNDQHSSALFTLRSAILAWQENKQHKENSLPWNTRRLTLYCTLDTRLWTTDGTEKVKQEK…		ABA21815.1	MRQNNINIEYRFGKAIRRRRRELDYSQEELAEKAGLHRNYISSIETGTRNPSLKNIEKLAKALNISISDLFTNYGIEAEDTEY		Trichormus variabilis ATCC 29413_(3)	75699950	2728081	2697159
ACK66979.1	MTLKTLECRLYAPSDTLRYLWLLMAEKNTPLINEIINHLSEHPDFDQWFKAKQIPKSAISDICNDLKSQENYQNQPGRFYSSAISLTHYMFKSWFAVHKQLQRRIEGKRRWLNLLKSDQELEQNCGQSLEIIIQKAEEILKLMDSEKSQSSSKPKKPKKPKKKKKSSSEETITLFDRLFKAYNQGNDSLESYALAYLLKNNGQIPEDDEDLDKFALRKRKKEIEIERLQQQLENRIPLGRDLTGELWQEMLTIVNESIPQDENEASAWQAKLLKKSHNIPYPVAYETNTDLKWSKDSRGHLLVTFNGLVESLKKLNLNPEFEIRCDRRHLPWFQRFCKDQEIKANNDQHSSALFVLRSARLIWREGQGKEDPWKIHQLYLQCSVETQLWTEAGTKQVQS…		ACK66978.1	MSKRVYLTLPDKVYEALERWADEQGRPVANLAAYLVERAVEKAESEGKIPLNKNNPKT		Rippkaea orientalis PCC 8801_(2)	218165370	NA	3074886
AUB36901.1	MSSNSKKDSNSQILRTIRCDLYTSEDVLRKVWEEMTEKNTPLIVQLLKTVSEQPEFEANKESGKITKKEITGLRKSLTEDSGRPYSSVDNLVKQVYSSWLTLYQKRKQQKEGKEYFLTHILKSDIELVEESNCDLSTIRSKAQEIIRKPEEFLNEINPKDTNNRQRKSSQKGRKKQHKSKEENKNFENSNTEASLTKDDSKSLTDTLYKIHRETKNILTRCAVAYLIKNDEKISNLEEENTKSLEKRRTEKEVEIKRLEKQIQNTRLPNGRDITGDTYTKAFDNLINQVPKDNDECAIWIANLLNKISSLPYPIHYVYSDLTWYKTEEGNIMVYFNGWKDYKFQICCNQRQLHLFERFLEDHKVFKKSEKSGEKLSASLFTLRSVQLLWQQKEPNKVRL…		AUB36900.1	MNWQQIFVVLMSQSDRVQTSIYFPKDIHEALVRWAEEEDRPISNLVVRLVSKAVEERQNKQNPPQQ		Nostoc flagelliforme CCNUN1	1297075411	2645534	2617860
AFZ13045.1	MSDQTSQNNEITIQSLLEAPEETLCFLWQLMVNVTELINSLLHHINTHPDFDIWLTQCAIPASVINSFIKTAKTQSPYREMPTRFITSAQNLVNEMFKSWFEIQRLKRLSLKGKRHFFTILKSDEELQRESDCTFDTLCQEAAIILQQTQLQIEQKRLDANQPPPTLDKQAFWEVAHVLYKAYDQADTPLVRSGIALLLKNQNQVPEQFEDPKKYQQRRQAKQEEIERLEHQLQSKAPKGRLTDQQEWLRILEKASQPITEVAEFRDIQAQLLRKFFALVYPVTFSTNTDLQWSTNQQGRICVQFYGMSKYTFEIACDRRQLNWFKRFLADYQLYKQHKTQIPTGLMPLRCARLVWTEGQDDFALIVATWLLIAVIQHKFYHIAWLLLKNHRIIKSPPW…		NA	NA		Crinalium epipsammum PCC 9333_(2)	428245228	2462850	2456552
KYC40734.1	MSTITIQCRLVAEEATLRYFWELMAEKNTPLINELLEQLGQHPDFDTWVQAGKMPEKTVENLCKSLEDREPFANQPGRFRTSAVALVKYIYKSWFALQKRRADRLEGKERWLKMLKSDVELERESNCSLDIIRAKAGEILAKVTEGCAPSNQTSSKRKKKKTKKSQATKDLPTLFEIILKAYEQAEESLTRAALAYLLKNDCEVSEVDEDSEKFKKRRRKKEIEIERLRNQLKSRIPKGRDLTGDKWLKTLEEATRNVPENEDEAKAWQAQLLREASSVPFPVAYETSEDMTWFTNEQGRIFVYFNGSAKHKFQVYCDRRQLHWFQRFVEDFQIKKNGDKKGSEKEYPAGLLTLCSTRLRWKESAEKGDPWNVHRLILSCTIDTRLWTLEGTEQVRAEK…		no_NCBI_ID	MAEETREVRGRIPKNLKIVFEVACARLEVTQTAALEEAIRDWLKKKESETGEKYLED		Scytonema hofmanni PCC 7110	1004814680	130004	104757
BAZ48744.1	MSSTSGKNLTNPIFRTISCDLSAKEDVLRKVWEEMSQKNAPLIVQLLKSVSEQPEFEANKENGTITKREITKLRRDITENSDLKEQSGRLRSSADSLVTEAYSSWLRLYQVRKNQKEGKEYFLKNILKSDVELVEQSNCDLQTIRCKAKEILSQVEEFIEQIKNKPKINQTKLAKKKNNKSNKSNKAIDKILNRFFIGNLDKTLTNTLYEIHRKSPDSLTQCAVAYLIKNDNKVSEAEENFTQLNKRRAAKEIEIKRLETQIQNTRLPIHYGRDITGEKYSQAFEKLVNQVPQDNEEFAEWIAILLKKVSSLPYPILYCSGDLSWYKDEKGNIFVYFNGWAEYHFQICCDKRQLRFFERFLKDYKALKPSKKEEEKVSGSLVTLRSAHLLWRQGKGKGE…		no_NCBI_ID	MSQSDRVQTSIYFPKDIHEALVRWAEEEDRPISNLVVRIVSKAVEEREKKQKP		Nostoc sp. NIES-4103_(2)	1210228378	1655677	1609105
BAQ63841.1	MAHVTIQCRLIASRDTRQFLWQLMAQKNTPLINEILLRIKQHPDFPHWRTKKRLPKDFLARQIAELKNNYPFEEQPSRFYASVNKVIDYIYKSWFEVQKALDWKLQGNLRWVEMLLPDTELIKHFDNSLESLQQQATLILDSIDSTVSHDRISTILFEKCGKTKKPEIKSAIIYLLKNGCTIPKKPETTEKYQDLKRKVEIKITKLHRQIESRIPLGRDLEDKKWLDTLITASTTAPIDQTEANTWFSILKQNQSSIPYPILYETNEDLKWSLNEKNRLSIRFSGLGEHSFQLCCDHRQLPYFQRFYEDQELKKASKDQLSSALFTLRSAMILWKEDEGKGELWDRHKLYLHCTFETRCLTAEGTSTIVEEKQKEVTKIIDLMKAKEELSDSQQAFIRR…		BAQ63842.1	MKERFFSSKQTSLITGCSLRQLQYWRDKEVIVPFIQGTGTGKTIYYSPAELVEISIMVYLLSVGLSFEIGQIILSDLKEKERNFRNPDYKGRFMIIPRDGKMSLLSYEREKAIELLDQGTSIVPLWLDRIHEQLKETLG		Geminocystis sp. NIES-3709_(2)	770470343	689556	699164
ACK66984.1	MTHITVVQCRLIAPESTLQHIWKMMAQQQTPLINQLLHDINTHPDINTWLTANQLPSKLVETLAQPLKTQSPYQGLPGRFITSAIILVKEMYASWFAIQTQKRLSLEGKKRFLTILKSDKQLIQDSQTDFLTLCYKAQQLLKRTQNKLKLDEPQHSEKAHWSIINALYPAYNNAKTPISRAAFALLIKNNGQVPDTPENPDYYQQRRKRKEIQIRRLEEQLKASLPKGRILDSKHWENTLKLAQTPITTIEEITSLQTQLLQKYSHLPFPVFYGTNTDLTWFKNPQGRICVKFNGLNQYPFQIACNKRQYPWFQRFFTDYQSYKSHKQQVPTGLMVLRSARLLWQPTNGQGEPWNTHHLSLHCAIDNDLWTISGIQQVKQQKILQTEQKIANFHSKALE…		NA	NA		Rippkaea orientalis PCC 8801_(3)	218165370	3104550	3093463
WP_174709822.1	MSQITIQCRLVASESSRHQLWKLMAELNTPLINELLHQVNQHPEFETWRQKGKHSISIVKELCQPLKTDPRFIGQPGRFYASAIALVNYIYKSWFALMKRSQFQLEGKIRWLEMLNSDVELVESSGVSLNSLRTKSAEILVQFATLNTAETQSTNVKKAKKRKKSQNSDSDRNLSKNLFETYRNTEDNLTRCAISYLLKNGCKINEKEEDAKKFAQRRRKLEIQIERLREQLETRIPKGRGLTATKWLETLVVATHNVPTNEAEAKSWQDSLLRQSSKVPFPVAYETNEDMTWFKNQFGRICVKFNGLSEHSFQVYCDSRQLHWFQRFLEDQQIKKNSKNQHSSSLFTLRSGRIAWQEEEGKGDPWNVNRVTLYCSVDTRLWTTEGTNQVREEKAEKIA…		WP_174709821.1	MQETFFTSKEAAEITGCTLRQLQYWRERGVIVPVISDTGTGRSIYYSKSNLVELAAMSYWLSVGLSFDIASATLKTLKDQEPELFISGKGKRFMLLQAQERSLELVEFDRKKAIASLDEGKAVIPVWLDVIYQRLESKLSN		Nostoc sp. TCL240-02_(1)	1857933189	2850565	2836613
WP_181927535.1	MSQITIQCRLVANANTRQQRQLMADKNTPLINELLLHISQHPDFGTWRHQGRFPISTVKQVCEMLKADPRFIGQPARFYTSATTLVNYIYKSWFALMKRSQFQLEGKIRWLEMLNSDVELVESSGVSLDSLRTKSAEILVQFATLNTAETQSTNVKKAKKRKKAQNSDSDRNLSKNLFETYRNTEDNLTRCAISYLLKNGCKINEKEEDAKKFAQRRRKLEIQIERIREQLETRIPKGRDLTAAKWLETIVVATHNVPTNESEAKSWQDSLLRQSSKVPFPVAYETNEDMTWFLNQFGRICVKFNGLSEHSFQVYCDSRQLHWFQRFLEDQQIKKNSKNQHSSSLSTLRSGRIAWQEEEGKGDPWNVNRLTLYCSVDTRLWTTEGTNQVREEKAEKIAK…		WP_181927536.1	MQEEFFTSKQAAEITGCTLRQLQYWREKEVVVPVIGDTGIGRSIYYSRSNLIELAAMAYWLSLGLNFDLASRTLRQIKEQEPELLNSGQGGRFMLLWNWETQSLELVEFNRERAILNLSDGLPVIPVWLDLIYSRVESRLLTGEN		Nostoc edaphicum CCNP1411	1886831842	3953930	3977426
WP_167726880.1	MSQITIQCRLVASEFTRQQLWKLMAEKNTPLINELLLRVAQNPEFESWRQKGKHPSGIVKELCQPLKSHPCFIGQPGRFYTSAIAIVNYIYKSWFALMKRSQSQLEGKIRWWEMLKSDTELVEASGVTLESLRNKAAEILAELTPQSDTVKAQPAKGNKRKKTKKAKVAEGDHSISKTLFDTYRDTEDILTRCAISYLLKNGCKINNKEEDAEKFAKRRRKLEIQIERLRAKLKARIPKGRDLTDAKWLETLLLATDNVPESEEEAKSWQDSLLKKSSKVPFPVAYETNEDMTWFKNEHERICVKFNGLGEHTFQVYCDSRHLHWFQRFLEDQQIKQKSKNQHSSSLFTLRSGRIAWQEGDGKGDPWKVNRLILYCSVDTRLWTAEGTNLVRVEKAEEI…		WP_167726879.1	MQETFFTSKQAAEITGCTLRQLQYWREKGVVVPVIGETGTGRSIYYSKPNLMELAAMLYFLSMGLSFDIASTTLNTLKDKEPELFDSGKGSRWMLLWQGHKRSLNLVMYDREQAIASLDEGKPVIPVWLDMIYQQLMNKLAG		Tolypothrix sp. PCC 7910_(1)	1828880029	7873766	7847943
WP_174709709.1	MSQNTIQCRLVASVVTRQQLWKLMADQNTPLINELLLQVAQDPDFETWRQKGKIPTGIVKQLCAVLKTDSRFTGQPGRFYTSAIARVNYIYKSWLALMKRLQYQLDGKNRWLEMLKSDTELVETSGVNLESLRIKAAEILVQVTPQSDTVEPQPVKGKKRQKTKKSKDSDSDCAERTLRDRTVSKSLFEAYSNTEDNLTRCAISYLLKNRCKVSEKEEDLKKFAQRRRKVEIQIERLTEQLAARIPKGRDLSDTKWLETLIIATQQVPSNEGEAKSWQDNLLKNPSRIPFPVAFETNEDMTWFKNKDGRICVKFNGFSEHTFQIYCDSRQLHWFQRFYEDQQIKRIGKKQHSSSLFTLRSGLIAWQEEEGKGDPWNVNHLILYCSVDTRLWTDEGTNLV…		WP_174709710.1	MQETFFTSKQAAEITGCTLRQLQYWREKGVVMPVIGETGIGRSIYYSKPNLIELAVMLYFLSMGLNFDVANTTLKILKDKEPELFESGKGTRWMLQRDNQKRSLELVEFELEQAIAQIKAGQPVIPVWLDTIHERIASKLK		Nostoc sp. TCL240-02_(2)	1857933189	2675864	2694583
WP_096598305.1	MSQITIQCRLVASESTRQQLWKLMAELNTPLINELLRQVHQHPEFETWRQKGKHPTSIVKELCQPLKTDPSFIGQPGRFYTSAIATVNYIYKSWFKLMKRSQSQLEGKIRWWEMLKSDAELVEVSGVTLESLRSKADEILAHFTPQSDTVEAQPGKGNKRKKTKKSKVAEGDCAERTLRERSISKTLFEAYRDTEDILTHCAISYLLKNGCKINDKEEDTQKFAKRRRKLEIQIERLREQLEARIPKGRDLTNGKWLETLLLATHNVPESETEAKSWQDSLLKKSSKVPFPIAYETNEDMTWFKNERGRICVKFNGLSEHSFQVYCDSRQLHWFQRFLEDQQIKQNSKNQHSSSLFTLRSGRIAWQEGEGKGEEWKVNHLIFYCSVDTRLWTAEGTNLV…		WP_096598303.1	MQEMFFTSKQAADITGCTLRQLQYWREKGVVVPVIGETGTGRSIYYSKPNLMELAAMLYFLSMGLSFDIASTTLNTLKDKEPELFDSGKGSRWMLLWQGHKRSLNLVVYDREQAIASLDEGKPVIPVWLDVIYQQLINKLAQ		Calothrix sp. NIES-2100_(2)	1248105500	1159416	1134530
WP_169266289.1	MSQITIQCRLVASESTRQQLWKLMAEKNTPLINELLLNVPQHQDFETWRQKGKHPTGIVKELCQPLKTDPRFISQPARFYASAIATVNYIYFSWLALMKRLQYKLEGKTRWLEMLRSDEQLVEASGVTLDSLRIKANEILAQLSPQSALVEAKEKKGNTVKKTRKSQNSDNNRSLSATLFQAYRDTEDILTRCAISYLLKNGCKVSDKEEDPEKFAQRHRKIEIQIERLREQLEARIPKGRDLTDTKWLDTLFVATHQVPNNQAQFISWQDSLLRQSSSVPFPIAYETNEDMTWFKNHQGRICVKFNGLSEHTFEVYCDQRYLHWFQRFLEDQQIKHESKNQHSSSLFTLRSGRITWFQEEGKRVRGSAAAAVPWNIHRLSLYCCVDTRLWTDEGTGLV…		WP_169266288.1	MQETFFTSKQAAEITGCTLRQLQYWREKGVVVPVISETGTGRSIYYSKANIVELAAMAYLLSTGLSFELASETLKKLKDQEPDLFNSGKGRRFMLLWDGKKRTLLLMEFDREKAITSLDEGKSVIPVWLDVIYQQLAVKERKSCSEVNNYEQ		Brasilonema sennae CENA114	1846990123	787660	779179
WP_168696136.1	MSQITIQCRLVVSESTRQQLWQLMVEKNTPLINELLSQIGKHPEFETWRQKGKHPTGIVKELCEPLKTDPRFMGQPARFYTSATASVNYIYKSWFALMKRFQSQLDGKLRWLEMLNSDTELVEASGVSLDVLQTKSAAILAQFAPQNPAETQPAKGKKTKKGKKAPTSDSKRNLSKNLFDAYSNTEDNLTRCAISYLLKNGCKISNKAENPDKFAQRRRKVEIQIQRLTEKLAARIPKGRDLTDTIRLETLFNATQTIPENETEAKFWQNILLRKSSQVPFPVAYETNEDMTWLKNQFGRICVKFNGLSEHTFQIYCDSRQLHWFQRFLEDQQIKKDSKNQHSSALFTLRSGRISWQEEEGKGEPWNVHHLTLYCSVDTRLWTEEGTNLVKEEKAEEIA…		WP_168696135.1	MQETFFTSKEAAQITGCTLRQIQYWREKGIVVPVIGDTGTGRSIYYSRSNLVELAALVYWLSTGISFDIACFILKQLKEQEPELFISGQGRRFMLLLSQDDSLSLVEFDRKRAIASLDEGKSVIPVWLDVIYQGLASKLPR		Dolichospermum flos-aquae CCAP 1403/13F	1833204574	2846324	2835593
WP_167726285.1	MSQITIQCRLVASESTRQQLWKLMAEKNTPLINELLTQVAQHPEFETWRQKGKHPTDIVKELCEPLRTDPRFIGQPGRFYASVIATVNYIYKSWFALMKRSQSQLEGKIRWWEILKSDPELVEASGVNLDSLRNKAAEILAELTPQSDTPEAQPAKGNKRKKTKKSKVAEGDRSISQILFEAYHDAEEILTLCAISYLLKNGCKIREKEEDAEKFTKRRRKLEIQIERLRKQLEARIPKGRDLTDVKWLETLLLATHNVPECEEEAKSWQDSLLKKSSKLPFPVIYRSSEDMTWFKDERGRICVKLNGLRKYLGKHSFQVYCDSRHLHWFQRFLEDQKIKRNSKHQHSSGLFTLRSGRIAWQEGEGKGDPWNVSRLTLYCSVYTRLWTAEGTNLVRVEK…		WP_167726286.1	MQETFFTSKQAAEITGCTLRQLQYWREKGVVVPVIGETGTGRSIYYSKPNLMELAAMLYFLSMGLNFDVASTTLKRLKDKEPELFESGKGTRWMLRRDNHKRSLELVEFELEQAIAQIKAGQPVIPVWLDTIHEHIASKLKD		Tolypothrix sp. PCC 7910_(2)	1828880029	7181872	7210733
WP_179072481.1	MSVITIQCRLVAEEDTLRQLWELMAEKNTPLINELLLQVGKHPEFETWLEEGKIPTELLKTLVNSLKTQERFADQPGRFYTSAIALVDYVYKSWFALQKRRKYQIEGKERWLKMLKSDLELEQESQCSLNVIRTKATEILTKFTPQSEQNSKQKKGKKTKKSTKSKKSSLFQILLNTYGETEDPLTRCALAYLLKNKCKISELDEDPEEFTRNRRKKEIEIERLKDQLQSRIPKGRDLTGEEWLETLEIATANVAQNEKEAKAWQAALLRKIADVPFPVAYESNEDMTWLKNGKGRLFVRFNGLGKLAFEIYCDKRHVQYFQRFLEDQEIKRNSKNQHSSSLFTLRSARLAWFPGEEKAKVWKGNHLHLYCSLDTRMWTTEGTQQVVEEKVTTITKTLT…		WP_179072482.1	MAEETREVRGRLPKDLKIAFEIACARLELTQTAALEEAIRDWLKKKESSEKQH		Nostoc sp. C057	1868012499	2177747	NA
WP_015161245.1	MSLITFPFRLDALGKTPKDREQVRRYFWELMTQQHTPLINRLNLLVAEHPKFANWQIKNTVDADDLLCLWRSLKKQPQFQGIPDRACVSARLVTHNTYESWLALQADRQEKLTKLLNSVEILKPDVELIAIGSCNLDVIRNRAKEVLSEVNTQISNDSEKKKSQKAIEGGIYKILYDKHRKTDDLVEKCAIAYLIKNRFKINSDETEEDVKKLNARRHTKQKEIEIIQKQLHSRLPKGRPWAGRDIFGEIASIDVRETEWNSIESALLKQQTFMPHPILFESSDDLIWAEPEKFQLKDLQVEAGKSGSTELDEFQNENFQGEQANSVESRKRVCVGFKSFEEKYAFEVAGDYRHIHAVWQALKERKIYDKNIDENTSALFLVRSATLIWRDYKKNENRI…		WP_198288379.1 [§]	MAIAPHTPAHRHWNALTAYLQPIEDDSMELNEFLKHWDVAREELAYICDCSLTTVNHWFSQGEHRRFPSQKHKQKLALAHHIWTTIETEPEYLQTLREMYIKKHLKR	MELNEFLKHWDVAREELAYICDCSLTTVNHWFSQGEHRRFPSQKHKQKLALAHHIWTTIETEPEYLQTLREMYIKKHLKR	Chamaesiphon minutus PCC 6605	434384225	4403164	4425842
WP_088892326.1	MAIKTLRLLLCFDENTRKQLWDLSVRHTLLINQLLVELPKQSKFESWRKKGSIPRKEIQLQLTHLKNKKFVHLKEEGVFEDIPARMLTSAVLSVQYMFASIFARQRKLHFQCEGKKTWLAIQEYDLDLAQSTDFTPEQIRDRAKQFLEEVEQRRQELREENQAEQDLPSVMSLLFQLFKETETPLEQRAIAYLLRNDCKVKVKKKKKKEGGEVEEAEVEDRDAILLRLSKKRIQIQRFEEQMAVELPIGRDPLGYRTDQLIQSAALFYPEGEFEAWQKEFAVRLANLSSDLETLPYPVLFGSNTDLYWSFETNTQPEEPKTSLCEIVNPNGTPSSRRKPKRRRYKKRKKLNTARICVRFKGFSGIQGKTYCDRRDLATLRQWVTDLEENKRRSKEDKFS…		NA	NA		Leptolyngbya ohadii IS1_(2)	1214783892	1464599	NA
WP_165390112.1 and WP_039728121.1 [#]	2 Proteins: MSVKETSXXSKLSSLSLSKFQNILSVSHETGKGCKKPKSLLKYLLDRYEETTQELERRAICHLLRHDLKVIEEEDTPDTIQHVIDRKRIEIERLTEQLQSRLPKGRDPNHERFVEKLEIAVALPDCSPEHWDPEEFDEWRIQKQISELNTLPYPILFGSASDLYWDILDNTTSATTVSAQKKSRKSKRPNERLQVRFKGLDEHKLRIQCDRRQLKIFRQFSTDYISNKLLPKDEKFGEGLCALRSACLIWKADPEASANRKNRQKASLRKDSRLRELLEQNKVCLIDYPWETHRLYLHCTFDSRLLTQQGTEQVRLQKLEAAQKSVEKIKERQAGDPSITLTENEKARFKAKQTSISRLERNRPPERPECQIYQPNPNIVLGVSLSR…		WP_039728120.1	MELEAFLNSWNVTREELAFICDCSLTTVNHWFSQGEHRRVPSEGHKQRLAIAHHIWVTVATEPSYLLTLRTMYHPERRKTVL		Halomicronema excentricum str. Lakshadweep	1578819390	734843	759671
WP_088893813.1	MRTITFRLCASEETRKIFWYLCQEHTLLVNALSHKVQQSKEFQTWQEKGWLPNKKLKLLNKEVLEEKTAFQVQVLDQTKLPDLPSRFIASAIRANQQTWGSWIAQQRRRYMSLTGKQDWLQLQECDLDLSQTTDFTFAQICTEVREVLASVTAQIAAEEQKKQNQKKRSRQTTKAKRTVKKQKKVSESRRITEALFKLLKKKQNALTMRAIAYLLRNNATVQEDEENPQEIALKLDQKRIEIERLKTQLQSQFPKPRDPTGAIADRYINEALEKPSFATSWKILVLFCLLITNQELPGLSLQFHSHLLQQLQHPDLSREAQQAEFKSWEEGCLERMTKLATVLKSLPLPISFDSSDDLYWSVEPKQQKAVEPKETTPAPTDGQPRRSPKRKRKNRRKIQ…		NA	NA		Leptolyngbya ohadii IS1_(3)	1214783892	3436873	3377146
WP_106255089.1	MQMRTIKTDSIVRITQRRKRKGVTEDLPSFDEAAWCRLCEFSYKHTLLVDTIVSQIKQHHKLINWIRSSQELQRQDDTTQETEAKQGQNGLPEGLVKALCDALASTPQFSKMSGRFYTSAIDRVEELFKGWFAAHQKLIHKIRGKRRWLAVVESDAALAETSNFSQQEIEIRAAQILAELEAHNGTNAGSNDHVDFNTLFQKFDETEETLARRAIIHLLKNGGKTHAEVKKPRKRKRKGKSISTQPLTLTERLEAQRVGIERLEKQLLGQLPRARNLFPEQAFEHHLEAVIAMPNSDATELERYYFLYFSLLLYLADANEYLQLERHLLTTLVLQWSKLGDLHYYRVLIYAFMLHAASAQQYLQLGSYLLQTIKLEAERVEAAFFAWHESITPKLHDFL…		NA	NA		Stenomitos frigidus ULC18_(2)	1361053883	218628	NA
BAU13962.1	MSMKTIRSDAIVKLDPKPRGRKKNLEDLPPFDTAAWCRLCERTYHHTLLIDQISEQIKQDPDVINWIRATQDVKAQTSITTDTDQDTDTEQGHSWLPKELVQKLCDRLKETPQFKGISGRIFTSATERVEEIYKSWIATHQKLIRQIRGKERWLTIVKSDAGLAENSNFSQLEIESRAEQVLSEIEAENESEDESDDARNRRVFNTLFDKFDTTEDVLSRRAIIHLLKNGGKVHWEPRKPRRRKGNQDKSSQPMTLEERLAAKQIEIDRLEKQLLSQLPRARNLFPDWAFEEALDDLLTLPDPDLARHNQYYFLAFSLLIHQSDPAQNIRFKQHLLKSMSFLWEKPNSLLYYRILIFSFLLYTTSKQKHLQFGHYLLRAIKVEAERVESQFYDWQASIT…		NA	NA		Leptolyngbya sp. NIES-3755	965629957	4533492	4483538
QOV23600.1	MSQITVQCHLVASESTRRQLWKLMAELNTPLINELLQQLSKHPDFEKWRKNGNLPSSVVSKLCKPLETDPRFAGQPSRCYSSAIYVVDYIYKSWLTIQKRLQQQLDGKIRWLEMLNSDAELVETTGYSLEAIRAKAVEILTTATPTSEADASSNKRRNTKKSKKASASNPEKSVSHKLFDAYQQTDDTLSRSAISYLLKNGCKLNDKEEDPEKFAQRRRKLEIQIQRLTDKLTSRIPKGRDLTKAKWLETLFTATTNVPEDNTEAKCWQDILLSRSSSLPFPLIFETNEDLVWSKNEKGRLCVHFNGLTDLTFEVYCDSRQLHWFKRFLEDQQTKRKSKNQYSSALFTLRNGRIGWQEGEGKGEPWLNRLTLSCCVDNRLWTAEGTEQVRQQKAEEIAK…		QOV23601.1	MEEKFYTSTEAAEITNCSRRQLQYWREKGVIVPTVNASGKGRNVYYSKADLLALTAMEYLLSIGLNFEVCQQILVTLKTRESWLFHESLSEEQMKRFMVLLDTNKHHLQLVDFDSKLALENIYNGFSVVCFWSDRIYQRLQEHLRNYVS		Anabaenopsis elenkinii CCIBt3563	1928838257	1046911	1056856
AUC60976.1 [§]	MLLYKYVLLNIIVDAMSLITIQCRLVASADTRQFLWMLMSQKNTPLINEIFMRIAEHPDFSVWKEKGKLPKNFLAQQIAELKEDKRFQGQPSRFYASVHKMIDYVYESWFTIQDKNKFRLQGHTRWLEMLKPDTEILQCFDGSWEKLQNQAKKILDEIDSTLSHTRIVDKLFKEYEATNDPRIQGAIVYLIKNGASIPDNKVETEKKYKKLKRKVEIQVHKLKKQIEISAPTGRDLNQQKWLDTLILASLASTTMPLNQAQCDRWFSALKKNSPSIPYPVIYETNEDLKWSLSDQNRLHVRFNGLSDHTFKIYCDSRQLPYFQRFYEDQELKKANKNQFSSALFTLRSAMIIWKEDDGKGELWDKHKLYLHCTLDTDYWTVEGTQVVAQRKQKEVLNII…	MSLITIQCRLVASADTRQFLWMLMSQKNTPLINEIFMRIAEHPDFSVWKEKGKLPKNFLAQQIAELKEDKRFQGQPSRFYASVHKMIDYVYESWFTIQDKNKFRLQGHTRWLEMLKPDTEILQCFDGSWEKLQNQAKKILDEIDSTLSHTRIVDKLFKEYEATNDPRIQGAIVYLIKNGASIPDNKVETEKKYKKLKRKVEIQVHKLKKQIEISAPTGRDLNQQKWLDTLILASLASTTMPLNQAQCDRWFSALKKNSPSIPYPVIYETNEDLKWSLSDQNRLHVRFNGLSDHTFKIYCDSRQLPYFQRFYEDQELKKANKNQFSSALFTLRSAMIIWKEDDGKGELWDKHKLYLHCTLDTDYWTVEGTQVVAQRKQKEVLNIIDGMKEKDDLRDTQKK…	AUC60977.1	MKQEVFFSSKDISKITGCSLRQLQYWRDKEVVVPFIGASGTGKTIYYSSVELVEVSVMVYLLSVGLNLEMVQKILNDLRAKEPDFTDSGCKKRFMVVAGDGTVDLLPYEQEGAIALLEENKGIIPLWIDQIHKILEIKINHC		Cyanobacterium sp. HL-69_(2)	1298149266	1520229	1531296
QSJ20838.1	MSQITIQCRLVASESTRQQLWKLMAEKNTPLINELLLKVAQQPEFESWRQKGKHPGKIVKELCEPLKTDPRFIGQPGRFYTSAIALVNYIYKSWFALMKRSQSQLEGKIRWWGMLNSDVELVESSGVSLDSLHTKAAEILAQLAPQLDTVEPQLGKGTKRKKTKKSKQSDSDRSISKTLFEAYRDTEEILIRCAISYLLKNGCKINNKEEDAEKFAKRRRKLEIQIERLREQLEARIPKGRDLTDAKWLETLLLATHNIPENEAEAKFWQDSLLKKSSKIPFSVAYETNEDMTWFNNERGRICVKFNGLSEHTFQVYCDSRHLQWFQRFLEDQQIKRNSKNQHSSSLFTLRTGRVAWQEGDSKGEEWNVNRLTFYCSVDTRLWTAEGTNLVREEKAEEI…		QSJ20340.1	MQETFFTSKQAAEITGCTLRQLQYWREKGVVVPVIGETGTGRSIYYSKPNLMELAAMLYFLSMGLSFDIASTTLKTLKDKEPELFDSGKGSRWMLLLQGHKRSLNLVVYDREQAIASLDEGKPVIPVWLDVIYQQLTNKLAR		Nostoc sp. UHCC 0702_(1)	1996588181	3973787	3993066
QSJ20352.1	MSSTSGKNPTNPIVRTISCNLSAKEDVLRKVWEEMSQKNTPLIVQLLKSVSEQPEFEANKENGTITKKEITELRRDITEDSDLKKQSGRLRSSADSLVTEVYSSWLRLYQVRKNKKEGKEYFLNNILKSDVELVEQSNCDLQTIRCKAKEILSQVEEFIEQVNNKPKINKTTSAKKKINKSNKNNKAIEEILNRFFIGNIDKTLTNTLYEIHRKSPDILTQCAVAYLIKNDNKVSEAEENLTQLNKRSSAKEIEIKRLETQIQNTRLPNGRDITGEKYSQAFEKLVNQVPQDNEEFAEWIAILLKKVSSLPYPILYSSGDLSWYKDEKGNIFVYFNGWAEYHFQICCDKRQLRFFERFLKYYKALKASEKGEEKLSGSLVTLRSAHLLWRQGKGKGEPW…		QSJ20353.1	MSQSDRVQTSIYFPKDIHEALVRWAQEEDRPISNLVVRIVSKAIEEREKQQNPQQ		Nostoc sp. UHCC 0702_(2)	1996588181	3993067	4006309
QSJ20360.1	MAEHQMNSISTFDITKYFLLDVLKDIKTGRIQLPDFQRDWVWDDTHVRRLLASISLAYPIGAVMMLQQSIQSRQFKPRLVDGVLKPENHAPNLLILDGQQRLTTLRSVKQLLGKNYNLLNRQRQQQQRLSHERHKAQKQNAPNSFGESELGQYVDRLLADAIVAIAKNYSASSIVLPKLRDMREIIQSEVQTRAEQKIKGYKEGQQEYAKQYRNSIHRWSYGRLIDCIQSKAAKVGILIEIGSEPTRGSPQEKARDLAVFAYQERQAALV		NA	NA		Nostoc sp. UHCC 0702_(3)	1996588181	4006320	4023276
no_NCBI_ID	MSELELGKHIDNLLAQAIITLAKSYQAGSIVLPTIKNVRESIQSEIEARAVKRCPNYKEGQQQYAKQYRQSIHRWSYNRLIGCIKSQAAKANISIEQGPQPIRDSPQEKARDLAIAAYHFRQNKS		NA	NA		Nostoc sp. 'Peltigera membranacea cyanobiont' N6	1353294854	4389877	4453074
WP_190711461.1	MSVITIQCRLVAEEDSLRQLWELMTEKNTPFINEILLQIGKHPEFETWLEKGRIPAELLKKLGNSLKTQEPFTGQPGRFYTSAITLVDYLYKSWFALQKRRKQQIEGKQRWLKMLKSDQELEQESQSSLEVIRTKATELFTKFTPQSDQNDNQKKGKKTKKATKSKTSSIFKILLNTYEETEDILTRCALAYLLKNNCQISEVDENLEEFTRNKRRKEIEIERLKDQLQSRIPKGRDLTGEEWLKTLEIATFNVPQNENEAKAWQAALLRKTAEVPFPVAYESNEDMTWLKNDKNRLFVRFNGLGKLTFEIYCDKRHLHYFQRFLEDQEILRNSKRQHSSSLFTLRSGRISWLPGEEKGEDWKVNQLNFYCYLDTRMMTCEGTKQVVHEKVTAITEILN…		WP_190711460.1	MAEETREVRGRIPKELKIAFEVACARLEVTQTAALEEAIRDWLQKKDSPAGDKSQRS		Anabaena lutea FACHB-196	1909842819	441584	427348
PSN12342.1	MAHLNTPLVTELMQVIQHHNDFVNWQQRRELPMQVVRNLCTSLRLDERFSGQPGRFYSSAAMMVAYTYDAWFALQSSRQQGLDGLKRWIDILKSDADMLELCGLDWKSFQASAKEILQSVTDQLQSDQPKPSPSHKGSQQRREQSDRTVSKRQLVNQLFQLHDESPSLLTRCVAVYLLKNGCAVLEKPEKPERYQRMLLGKKKAAKRLEEQLASRLPKGRDLTDETFLKALELLTYQIPNSAEELARWKAQLLRKPNPLPFPILYGSNNDLTWFVKEKPRGKAKPPKQQICVKFNGLGKHVFRVQCDRRQHHYFQRFVQDWEVYKCGKGPISGSLLLLRTASLLWKPANQSSHQPTGNPWQDNYLYLHCQIDTQLLTREGIEQKRQKKLNSTQNPDLSP…		NA	NA		filamentous cyanobacterium CCT1	1370496743	759	NA
PSN81036.1	MVTYTALVNELLELVSQHPKFEVWRQQGKITRDEVKSILRPLKQNSVYAALPGRFFTSAELMVTYAFKSWLALQKHRHHQMVGKLRWLQVIEADLQAMPTSDLSLEVVQARAQQVLEHAEQSTDTQQGRSSFLSRKGKRRGNPLMGFLLDAYEAASDELERRAICYLLRNDLKVVEEDENPEVIQFRIDRKRIEVERLQDQLQSRLPKGRDPTDERYLEALGAAIALPDVDLSPIDEEDWSQWKAQKQLPLLNPLPYPILWGSSSDLRWSIIANSEADGQPSKRRKSSKRPKEKIQVQFNGLGKHTMSIQCDRRQLPVFKQFAEDYITHESTAEEDKFGMSLFALRSACLVWKKDPQAAVKRRKHKQKAKAQLDKITDYDAPWQTHRLYLHCTVDTRLI…		NA	NA		filamentous cyanobacterium CCP4	1370673884	6304	29551
WP_231948458.1	MERYTLLVNLLSKQVGHAPEFEQWKRQGWISEKAVVALCNALKQEEQFKGLPSRFYMSAQSMVKDTFEGWVKSQQRLSRKISGKKRWLKSVEEDIDLAKTTDFSPEVIQNRAKEILSELHHQETPAPQSSEISDDSPDESQQEDEDSNSQRSILSLLFDRYKVTEDYLSRRAVVHLLKNGCEVNEEIEDPEKLQQRLATKREEIQRLEAQLASRLPKGRDPTGEKANNFLKEAIQFPKHRNCYPELFLFDIFYHYALLPMPSVQYAVYLLQAILIESNVVESEFSAWQEAMTERLSNAAKIPNSLLYPLIFGSTDDLYWSFESKEKNQHDSELGKPCEGTKSRKRPSKRKRKQLKTRSEERIYVRFKGLSDYNFKIACDRRQLPIFQMFTRDWLSNKKL…		NA	NA		Phormidesmis priestleyi BC1401	1057523847	5280	NA
PSB14763.1	MVKYTLLVNRLLEQVGQLSEFKQWQEKGSISKEPVKQLCDALKKHHAEFQGLPHRFYISAKLMVTYTFESWLALQQRRRRKIDGKRRWLNRVEDDIELAKVTDFSPEMIQNRARKILAEIHPSNPVEPEPETSSDNEINEGENCQEEEEMNQPKSLLSCLFDLYDSTEDALTLRAIVHLLKNNGEVNEEDEDPKKLELRLAAKREEIQRLEKQLQGRLPKGRDPTGETTTRFLEEAIKLPEHPTAYPPRFLLNAFYCYALLPMPYIQYGVYLLNAILDEARIVESDFITWRDTIAEHLVNAAKRPNSLPYPLIFGSTSDLVWESESKRKGPNAPDTEGALEQSGAKSSRKRPSKRKRTRLKTQSDERITVRFHGMSQYRFKIYCDRRQLPIFRQFLTDY…		NA	NA		filamentous cyanobacterium CCP2	1360391466	903	18156
QXE24819.1	MSQITIQCRLGASESTRQQLWQLMAEKNTPLINELLIQIGRHPEFETWQQKGKHSTGIVKELCESLKSDSRFMGQPARFYTSATASVNYIYKSWFALMKRYQSQLDGKLRWLEMLNSDTELVAQSGVSLDTLRTKSAEILAQFAPQETNGNTPTKGKKSRKRKKSQNLDSEINLSKHLFDTYDHTEDHITRCAISYLLKNGCRINNKGENPEKFAQRRRKLEIQIQRLTEKLAARIPQGRDLTDTQWIETLITATQTVPEDEAEAKLWQNYLLRKSSQVPFPVAYETNEDMIWLKNQAGRICVKFNGLGEHTFQIYCDSRQLHWFQRFLEDQETKRSSKNQHSSALFTLRSGRIAWQEGEGKGEPWNVNHLILYCSVDTRLWTQEGTNLVRSEKAEEIA…		QXE24818.1	MQETFFTSKEASKITGCTLRQLQYWREKGVVVPVISDTGTGRSIYYSKTNLVELAAMVYWLSVGLSFDIACETLKTLKEQEPELFSSGTGKRFMLLSETQERSPLGVVKLSLELMEYDRKKAITSIDEGKPVIPVWLDVIFEQLQKKLTSYLN		Richelia sinica FACHB-800	2059364121	3773942	3764339
BAZ64546.1	MRYLQTGNLHILVGVSLGLKKPATVAAVDVVSNKVLAYRSVKQLLGQNYKLLNRQRQQQQRLAQKRHESQKKQAPNQLGESELGQYLDRLLAKSIINFAVTYQASSIALPKLRDMREIIQSEIQAKAETKISGYKEGQQKYAKEYRMSVHRWGYGRLIDNIQAQAAKAGITIETPSQQTKGSPQEQAKDLAICAYKKRQAMLNK		NA	NA		Calothrix sp. NIES-4105	1210245310	228310	NA
